# Supplementary material for: Cisplatin and Starvation Differently Sensitize Autophagy in Renal Carcinoma: A Potential Therapeutic Pathway to Target Variegated Drugs Resistant Cancerous Cells
Source: MDPI journal article supplement (doi:10.3390/cells13060471), 2024-03-07
Supplement: s1 [file s1]

# Cisplatin and Starvation Differently Sensitize Autophagy in Renal Carcinoma: A Potential Therapeutic Pathway to Target Variegated Drugs Resistant Cancerous Cells

Ankita Dutta <sup>1</sup>, Subarna Thakur <sup>2</sup>, Debasish Kumar Dey <sup>3,\*</sup> and Anoop Kumar <sup>1,\*</sup>

<sup>1</sup> Advanced Nanoscale Molecular Oncology Laboratory (ANMOL), Department of Biotechnology, University of North Bengal, Siliguri 734013, West Bengal, India; ankitadutta71994@gmail.com

<sup>2</sup> Department of Bioinformatics, University of North Bengal, Siliguri 734013, West Bengal, India; subarna.thakur@nbu.ac.in

<sup>3</sup> Stephenson Cancer Center, University of Oklahoma Health Sciences Center, Oklahoma City, OK 73104, USA

\* Correspondence: debasish-dey@ouhsc.edu (D.K.D.); anoop@nbu.ac.in (A.K.); Tel.: +91-353-2776354 (A.K.); Fax: +91-353-2699001 (A.K.)

**Citation:** Dutta, A.; Thakur, S.; Dey, D.K.; Kumar, A. Cisplatin and Starvation Differently Sensitize Autophagy in Renal Carcinoma: A Potential Therapeutic Pathway to Target Variegated Drugs Resistant Cancerous Cells. *Cells* **2024**, *13*, x. <https://doi.org/10.3390/xxxxx>

Academic Editors: Fulvio Reggiori and Shigeomi Shimizu

Received: 12 January 2024

Revised: 26 February 2024

Accepted: 3 March 2024

Published: 7 March 2024

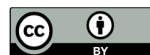

**Copyright:** © 2024 by the authors. Submitted for possible open access publication under the terms and conditions of the Creative Commons Attribution (CC BY) license (<https://creativecommons.org/licenses/by/4.0/>).

## Supplementary Figures

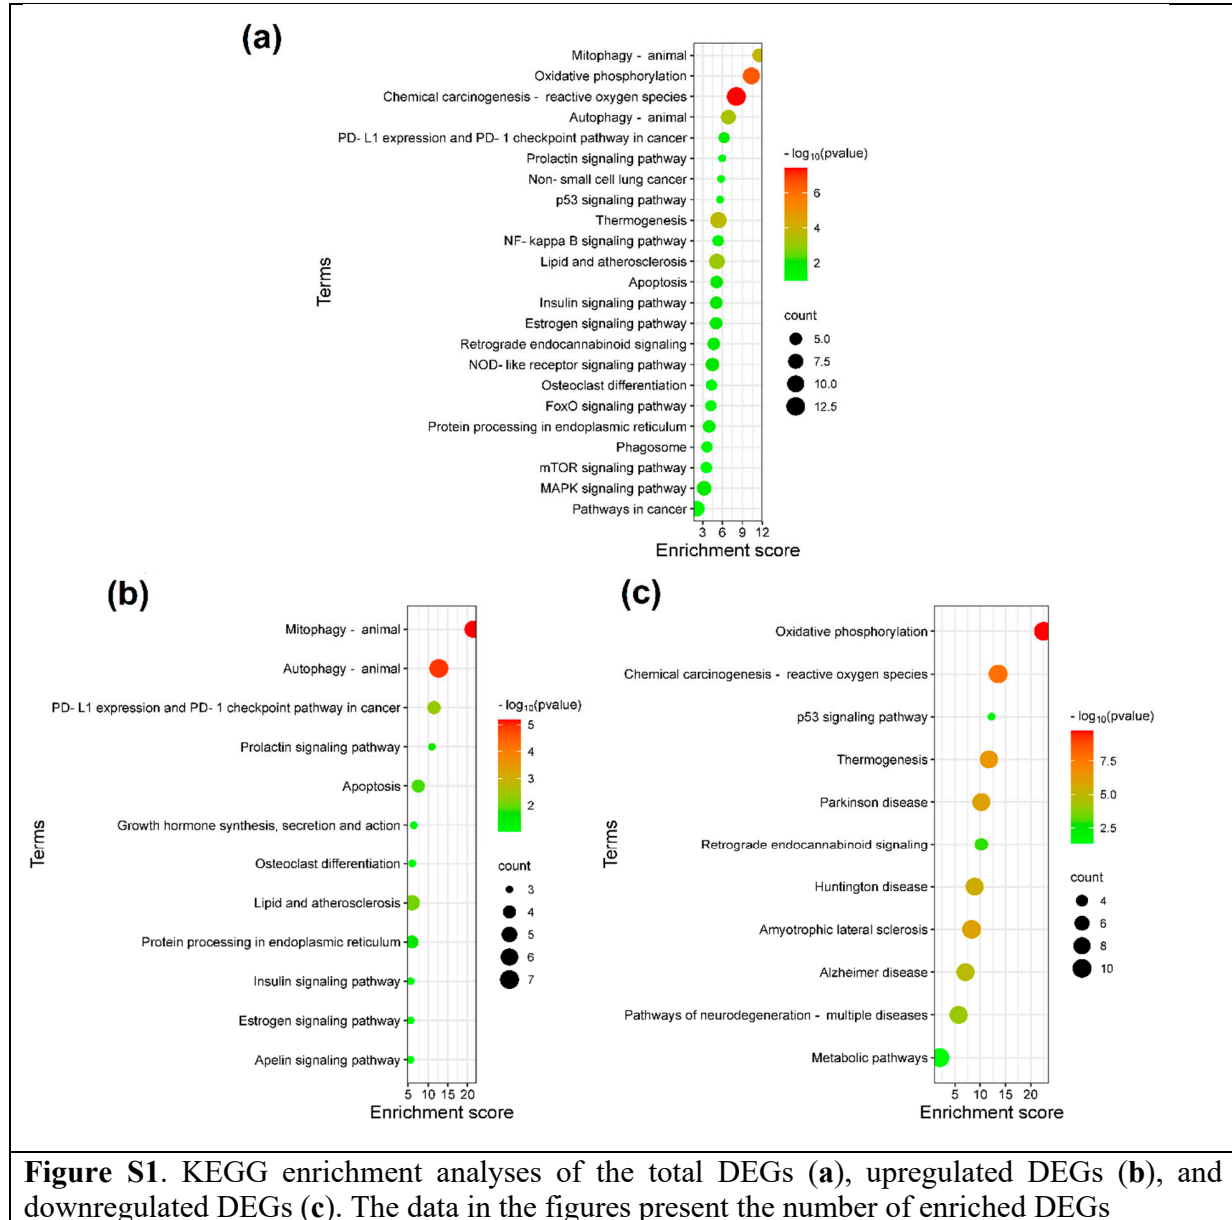

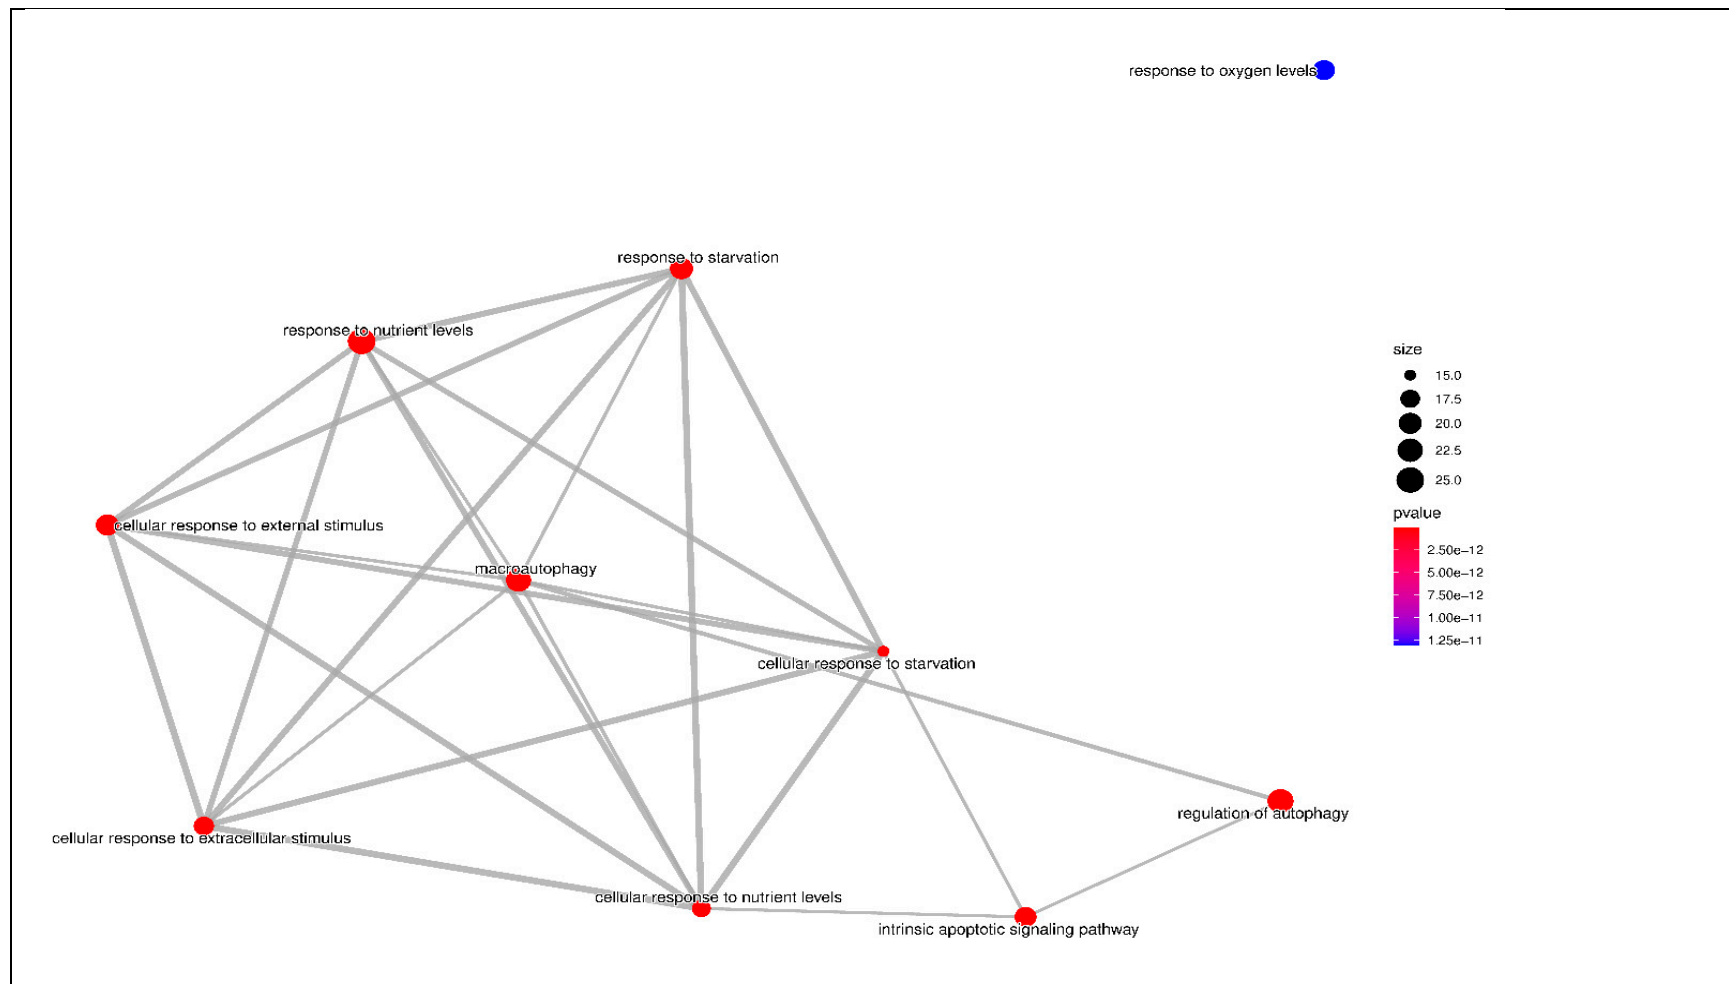

**Figure S2.** Emap plot of enriched “Biological Process” gene ontology terms ( $P < 0.05$ ,  $FDR < 0.05$ ). The plot is generated by SRPLOT (<http://www.bioinformatics.com.cn/srplot>) tool based on the output of enriched biological processes. P value - Benjamini-Hochberg adjusted P-value for the enriched ontology term. Size – number of DEGs belonging to enriched gene ontology term.

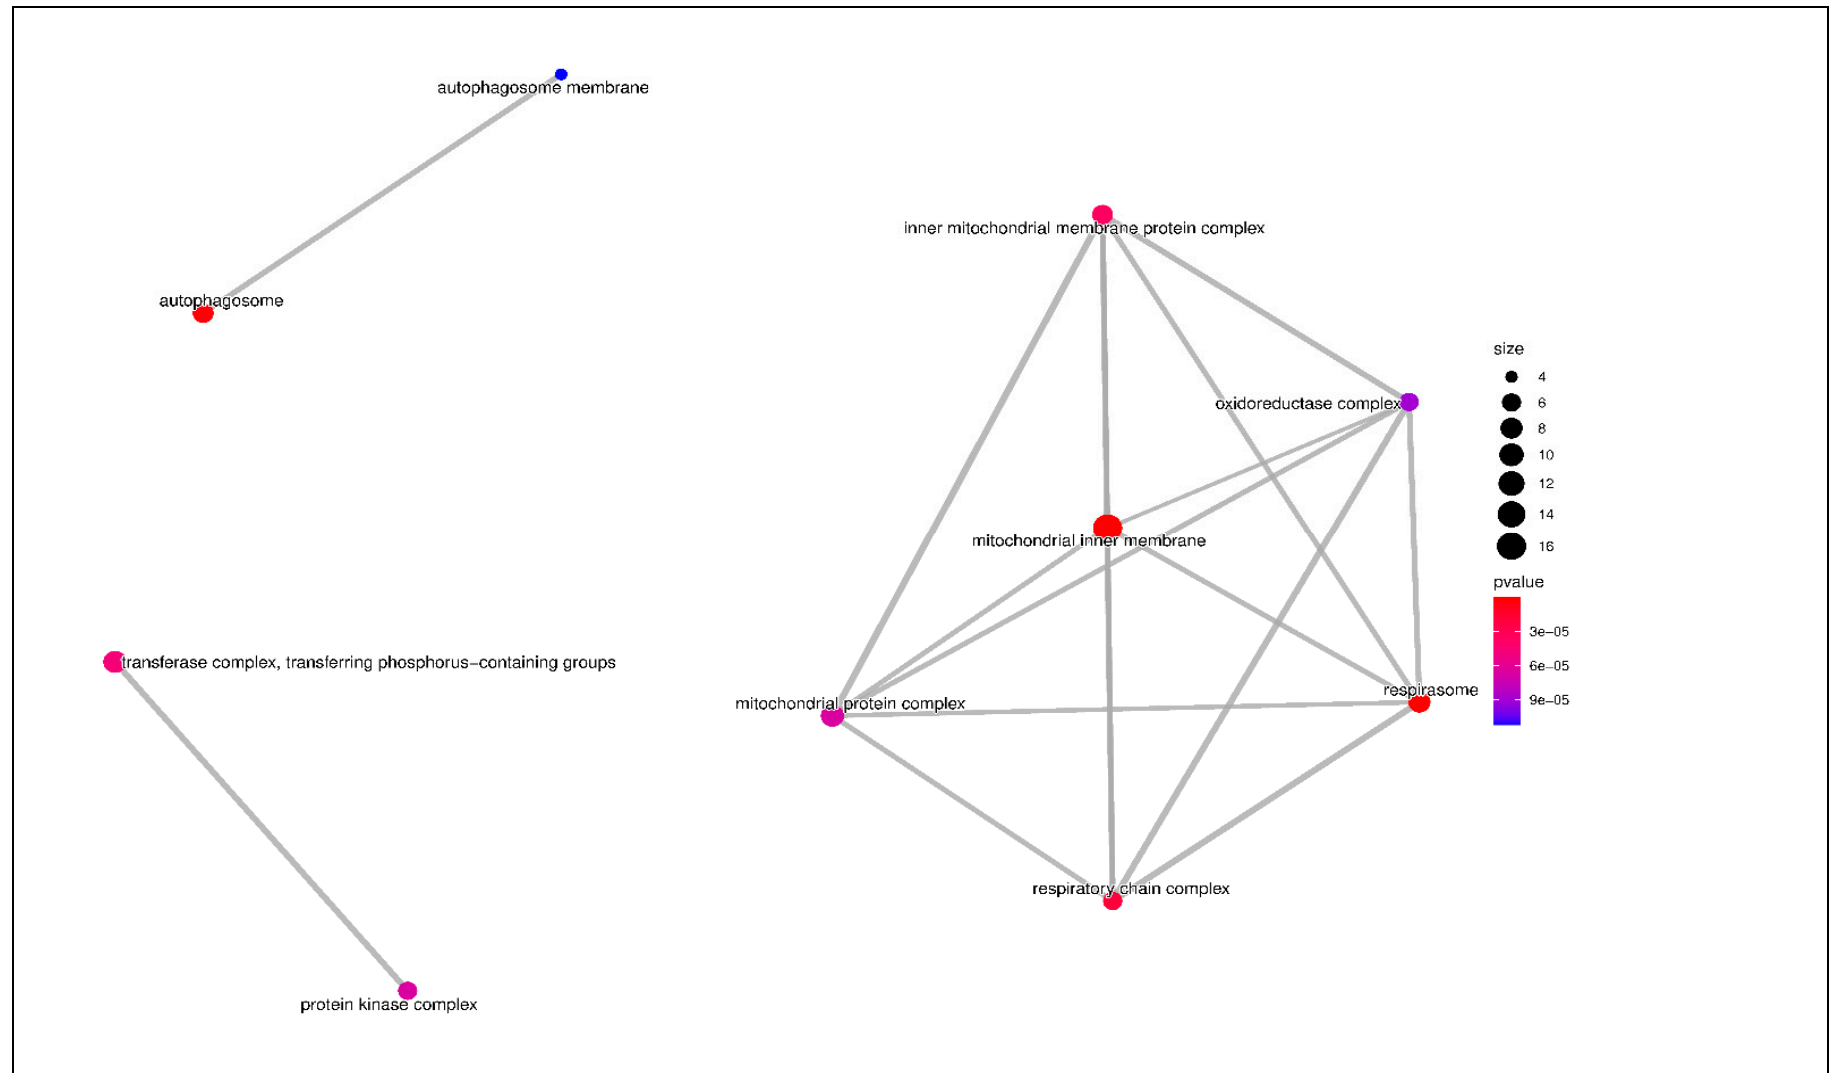

**Figure S3.** Emap plot of enriched “Cellular component” ontology terms ( $P < 0.05$ ,  $FDR < 0.05$ ). The plot is generated by SRPLOT(<http://www.bioinformatics.com.cn/srplot>) tool based on the output of enriched biological processes. P value - Benjamini-Hochberg adjusted P-value for the enriched ontology term. Size – number of DEGs belonging to enriched gene ontology term.



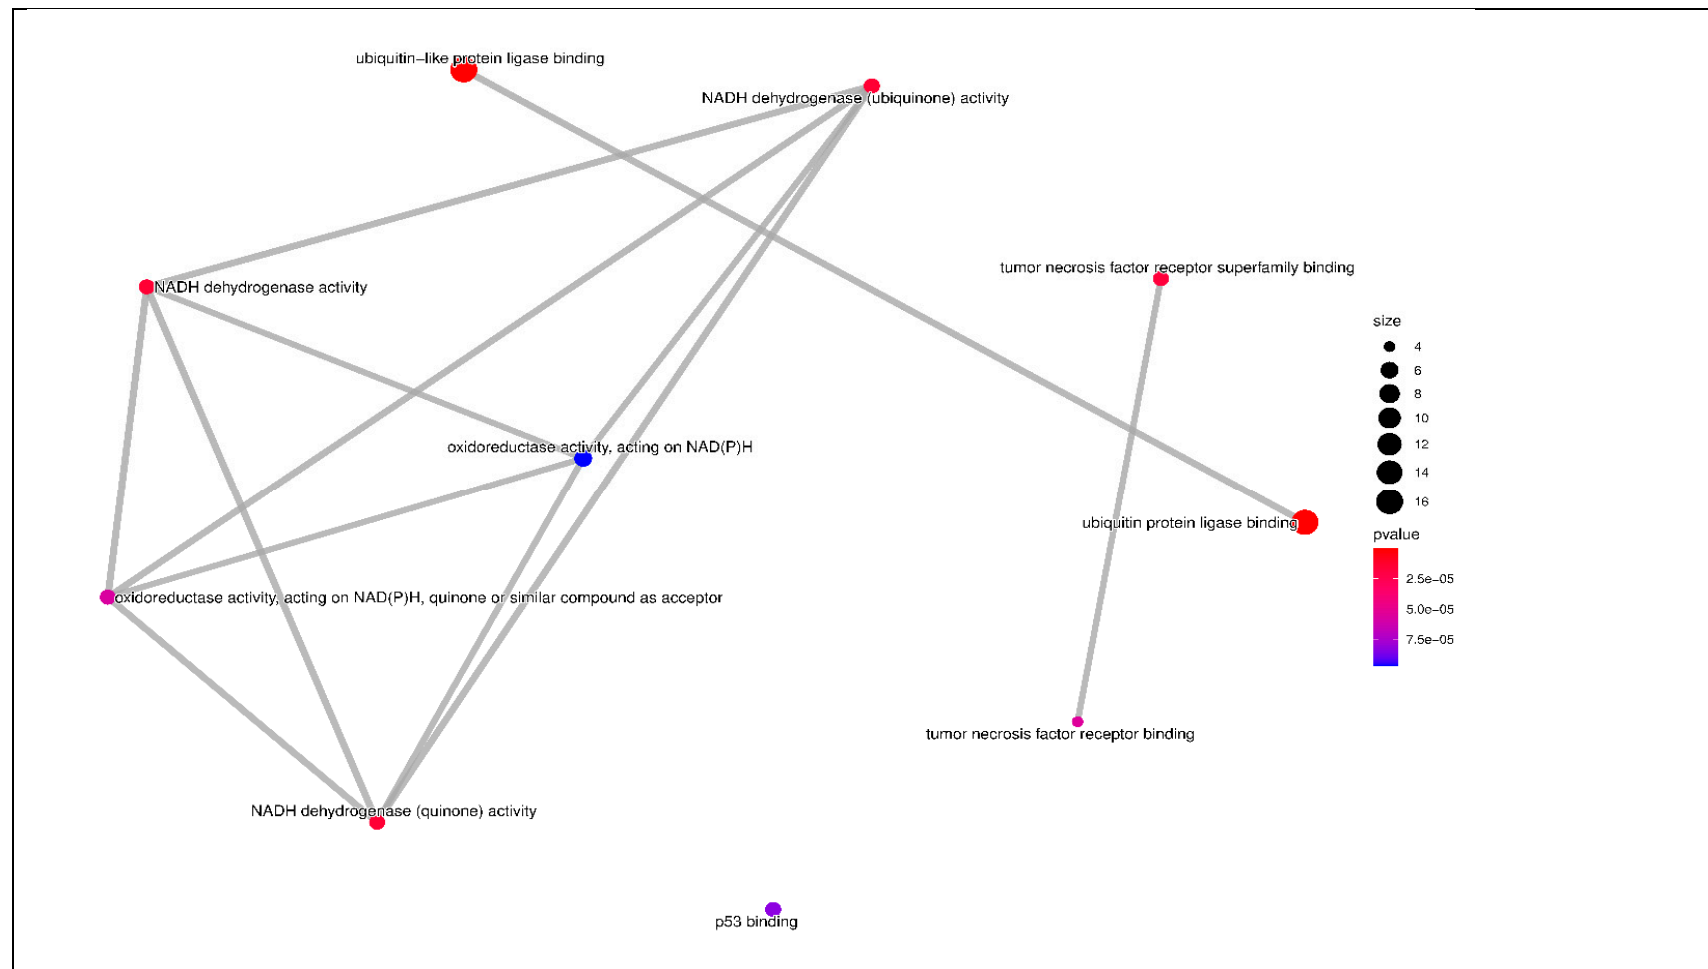

**Figure S4.** Emap plot of enriched “Molecular function” ontology terms ( $P < 0.05$ ,  $FDR < 0.05$ ). The plot is generated by SRPLOT(<http://www.bioinformatics.com.cn/srplot>) tool based on the output of enriched biological processes. P value - Benjamini-Hochberg adjusted P-value for the enriched ontology term. Size – number of DEGs belonging to enriched gene ontology term.

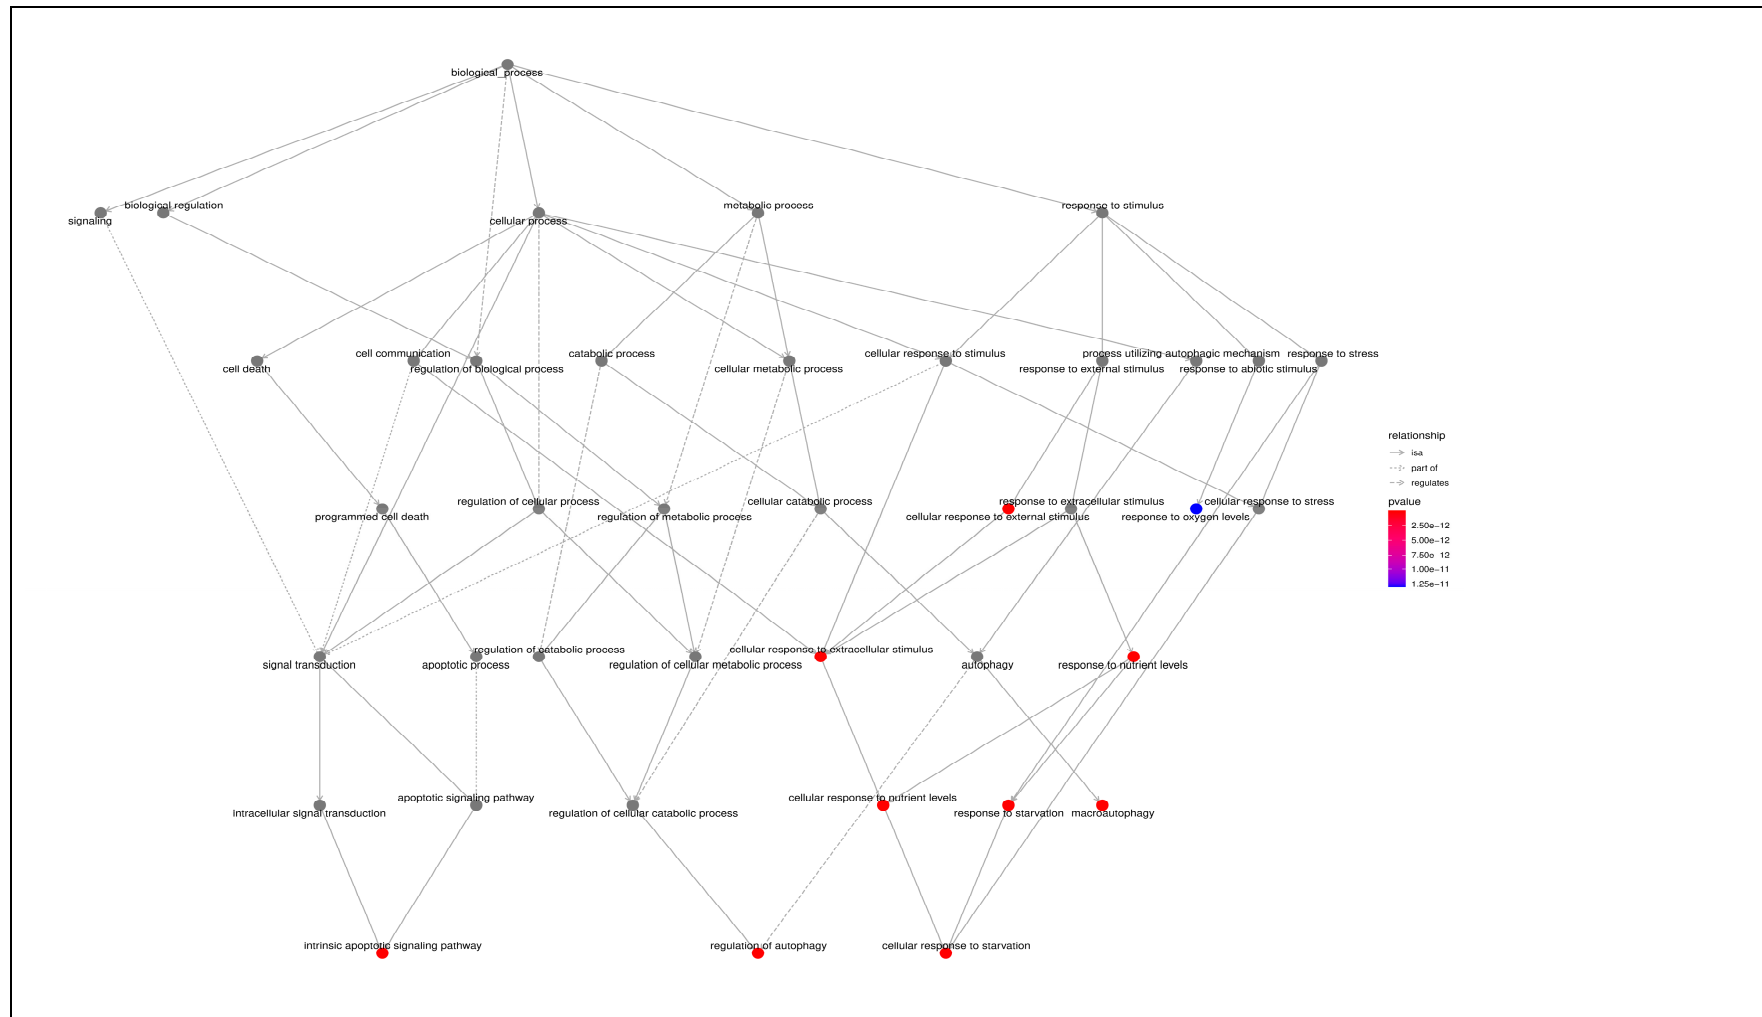

**Figure S5.** Go plot of enriched “Biological Process” ( $P < 0.05$ ,  $FDR < 0.05$ ). The plot is generated by SRPLOT(<http://www.bioinformatics.com.cn/srplot>) tool based on the output of enriched biological processes. P value - Benjamini–Hochberg adjusted P-value for the enriched ontology term. Size – number of DEGs belonging to enriched biological process. Colour- intensity indicates enriched biological processes.

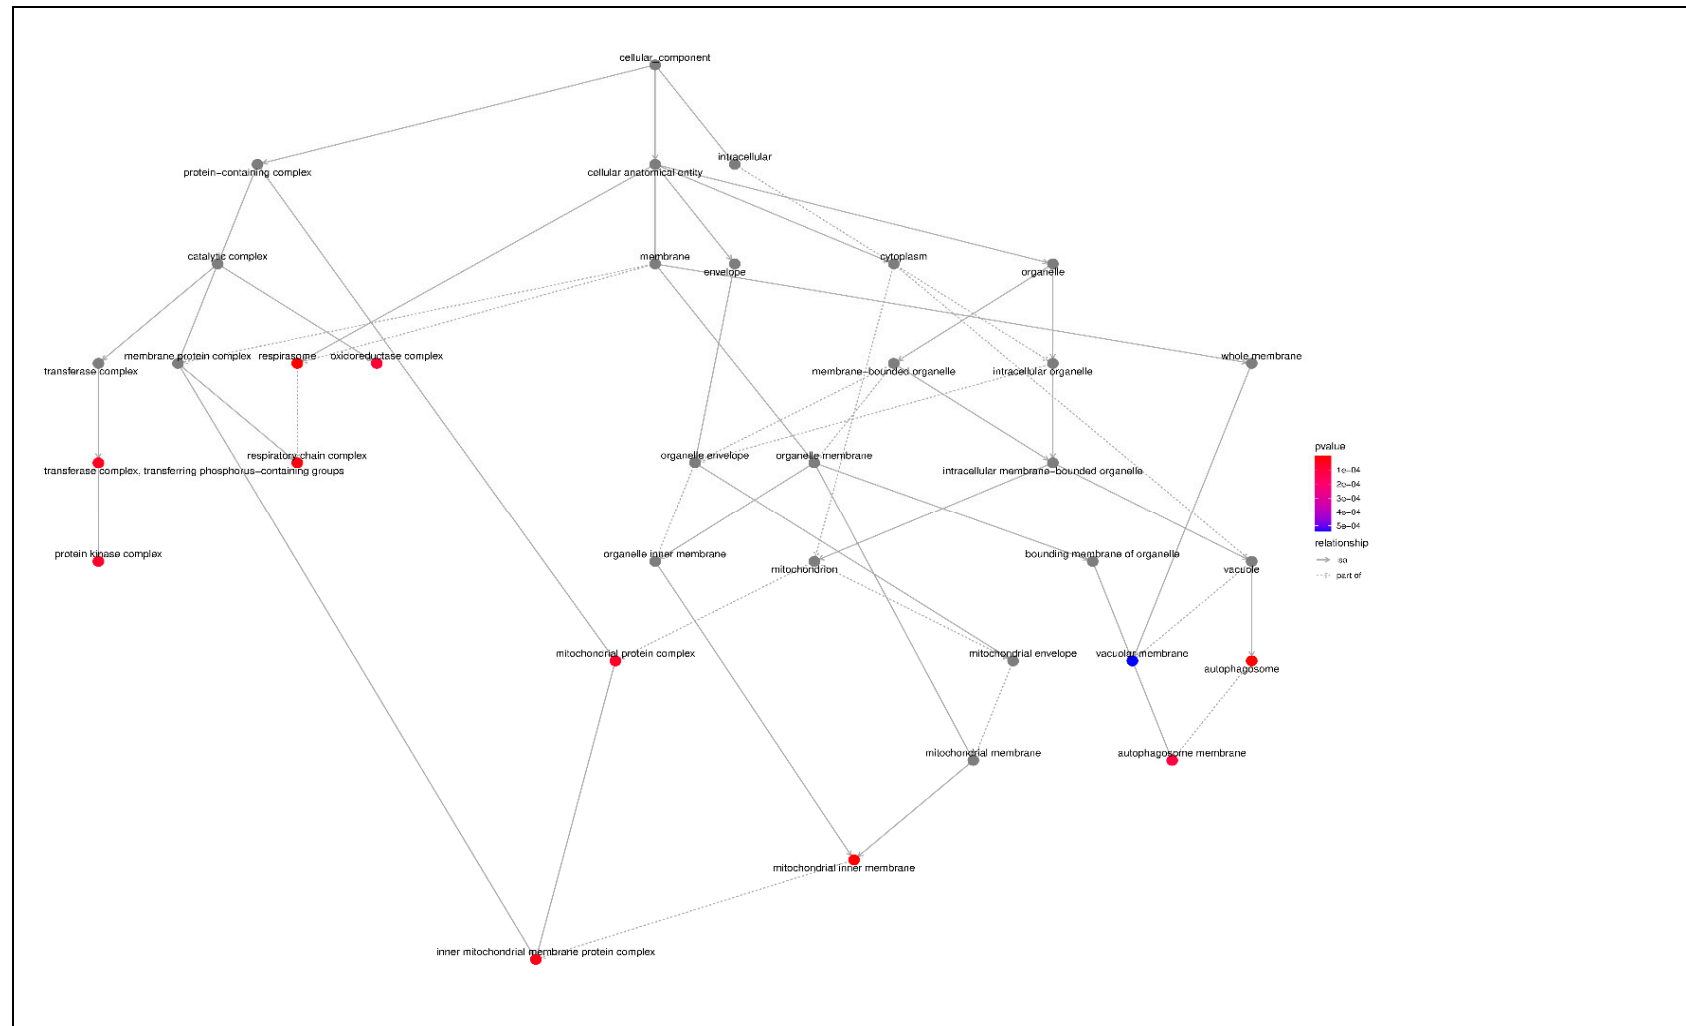

**Figure S6.** Go plot of enriched “Cellular components” ( $P < 0.05$ ,  $FDR < 0.05$ ). The plot is generated by SRPLOT(<http://www.bioinformatics.com.cn/srplot>) tool based on the output of KEGG analysis. P value - Benjamini-Hochberg adjusted P-value for the enriched ontology term. Size - number of DEGs belonging to enriched cellular components. Colour- intensity indicates enriched cellular components.

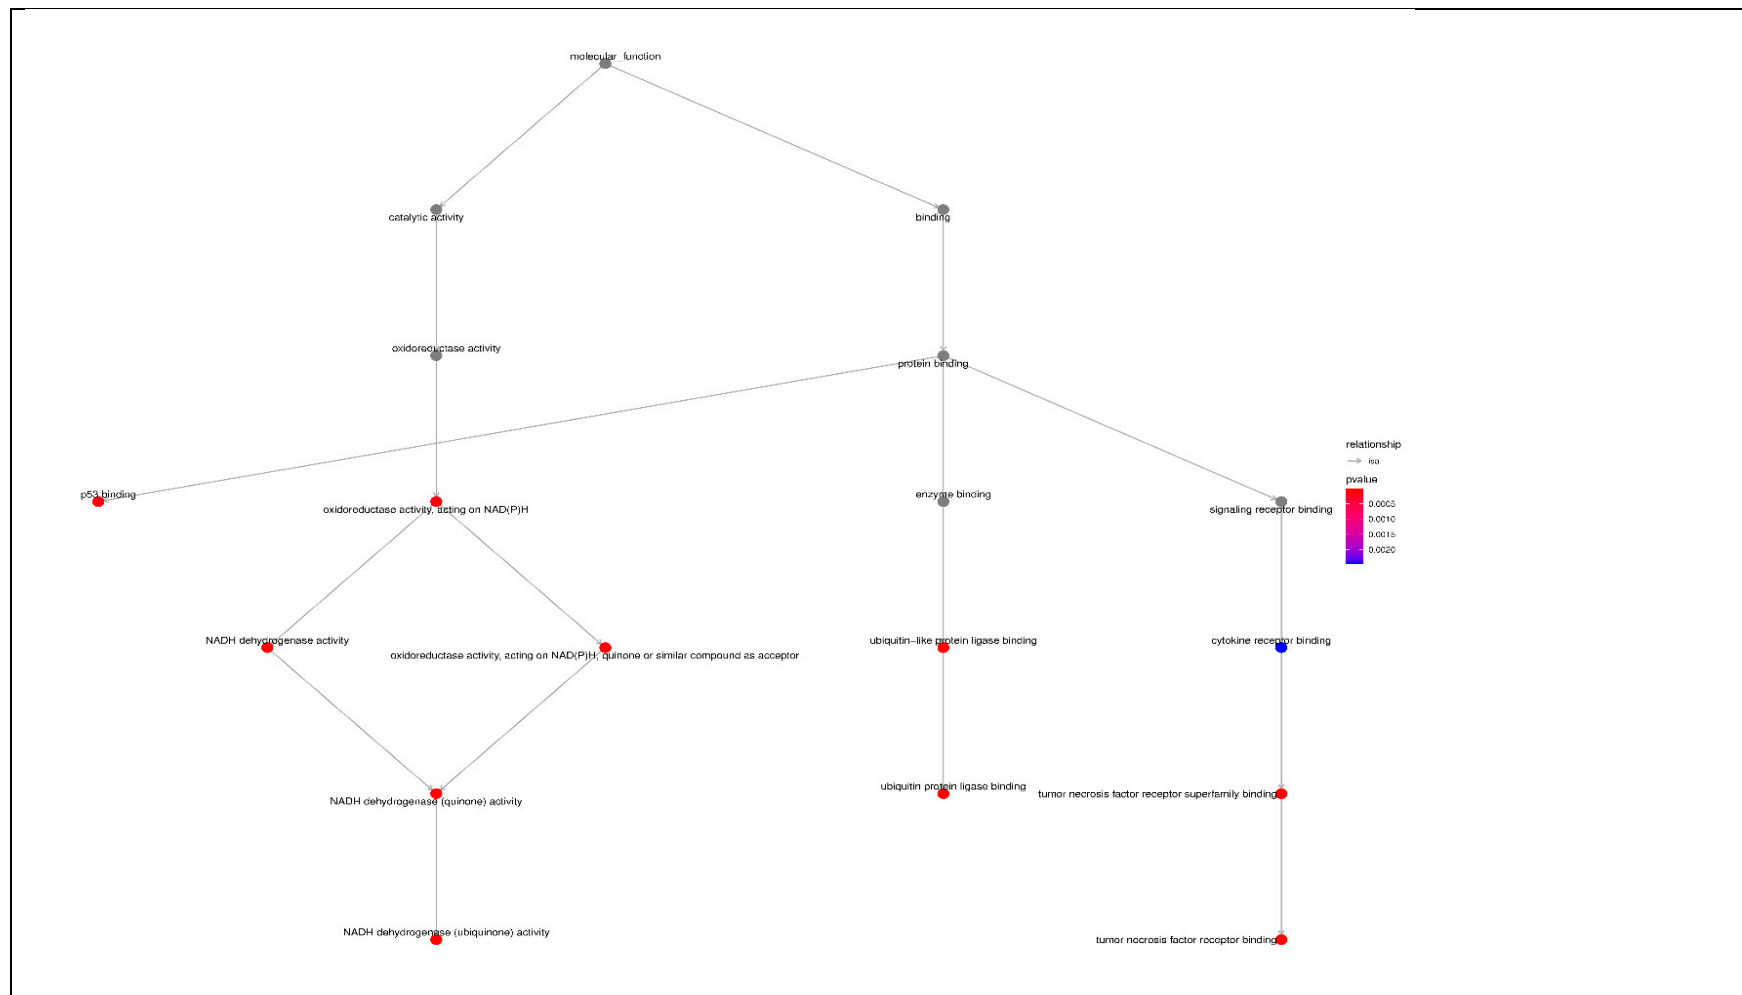

**Figure S7.** Go plot of enriched “Molecular function” ( $P < 0.05$ ,  $FDR < 0.05$ ). The plot is generated by SRPLOT(<http://www.bioinformatics.com.cn/srplot>) tool based on the output of KEGG analysis. P value - Benjamini–Hochberg adjusted P-value for the enriched ontology term. Size – number of DEGs belonging to enriched molecular functions. Colour- intensity indicates enriched molecular activities of DEGs.

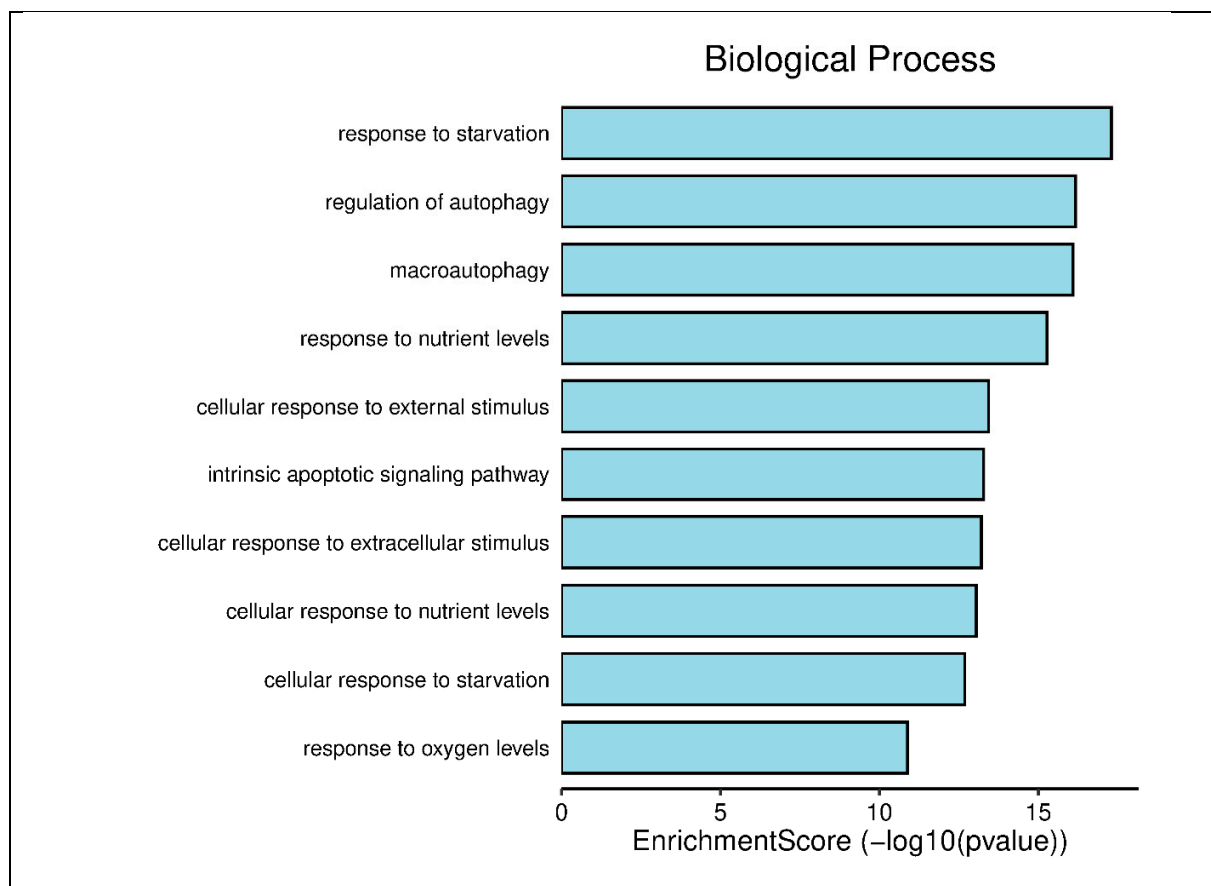

**Figure S8.** Enrichment Score plot of major “Biological Process” involved. The plot is generated by SRPLOT(<http://www.bioinformatics.com.cn/srplot>) tool based on the output of KEGG analysis.

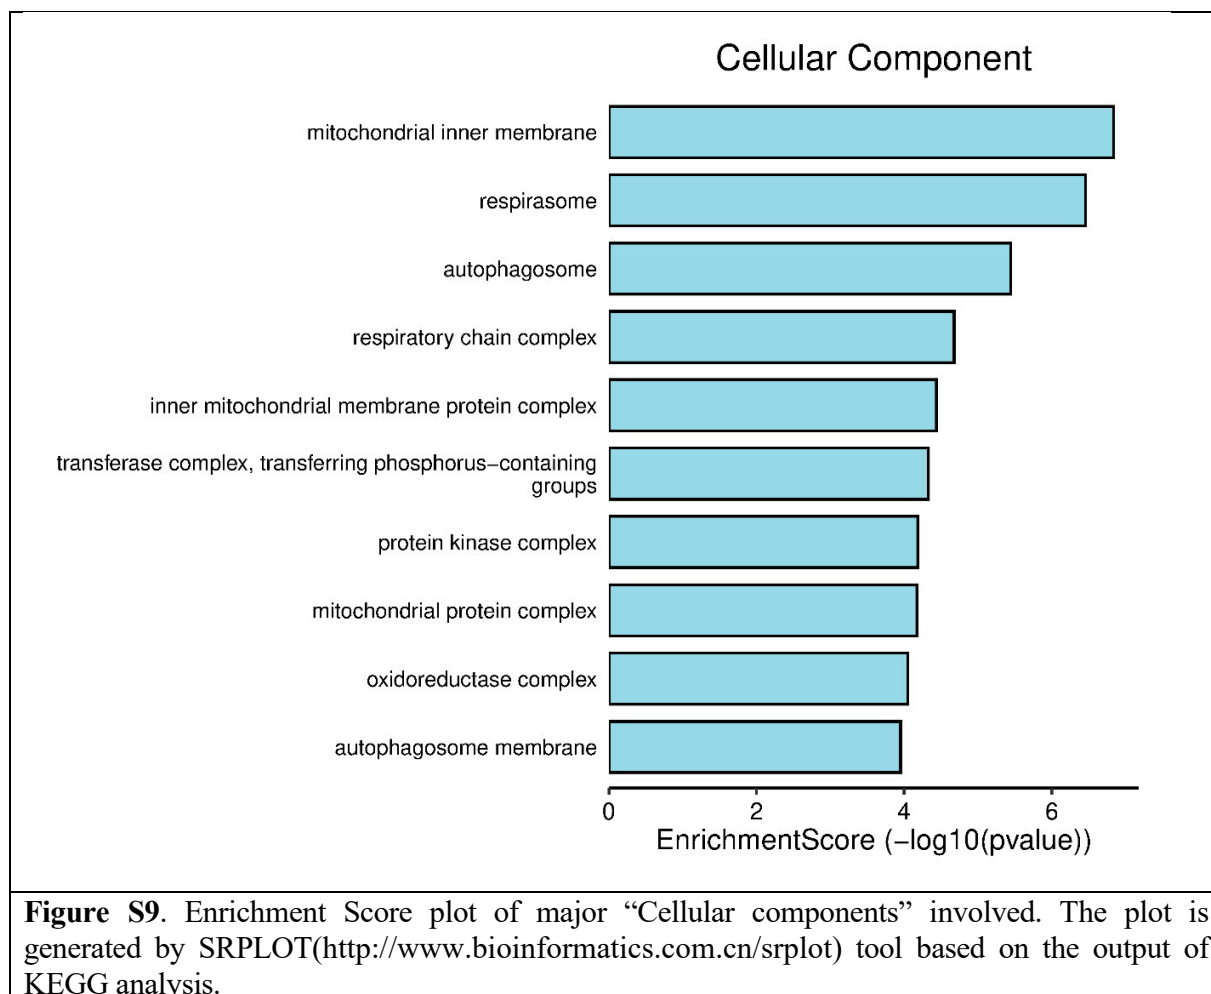

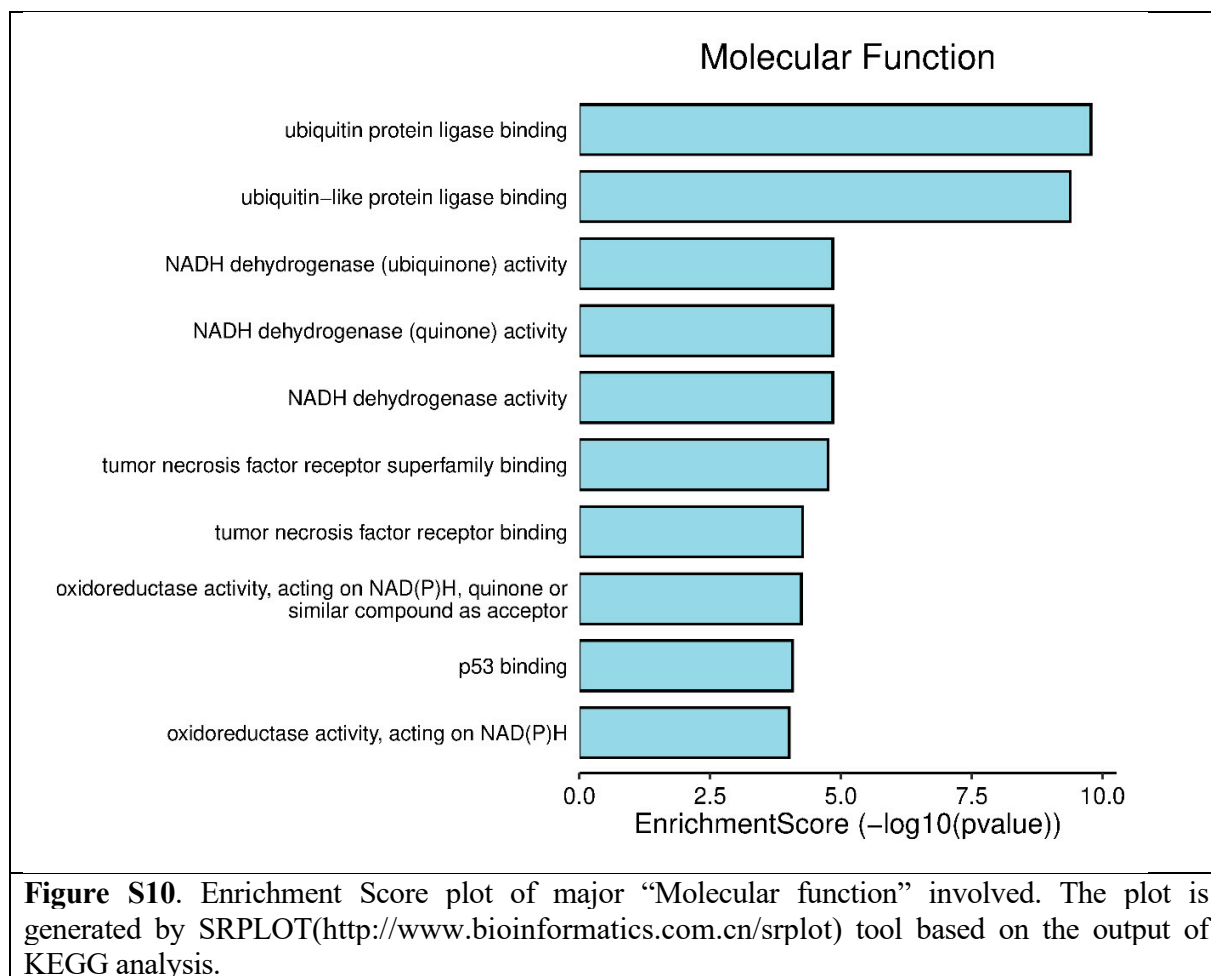

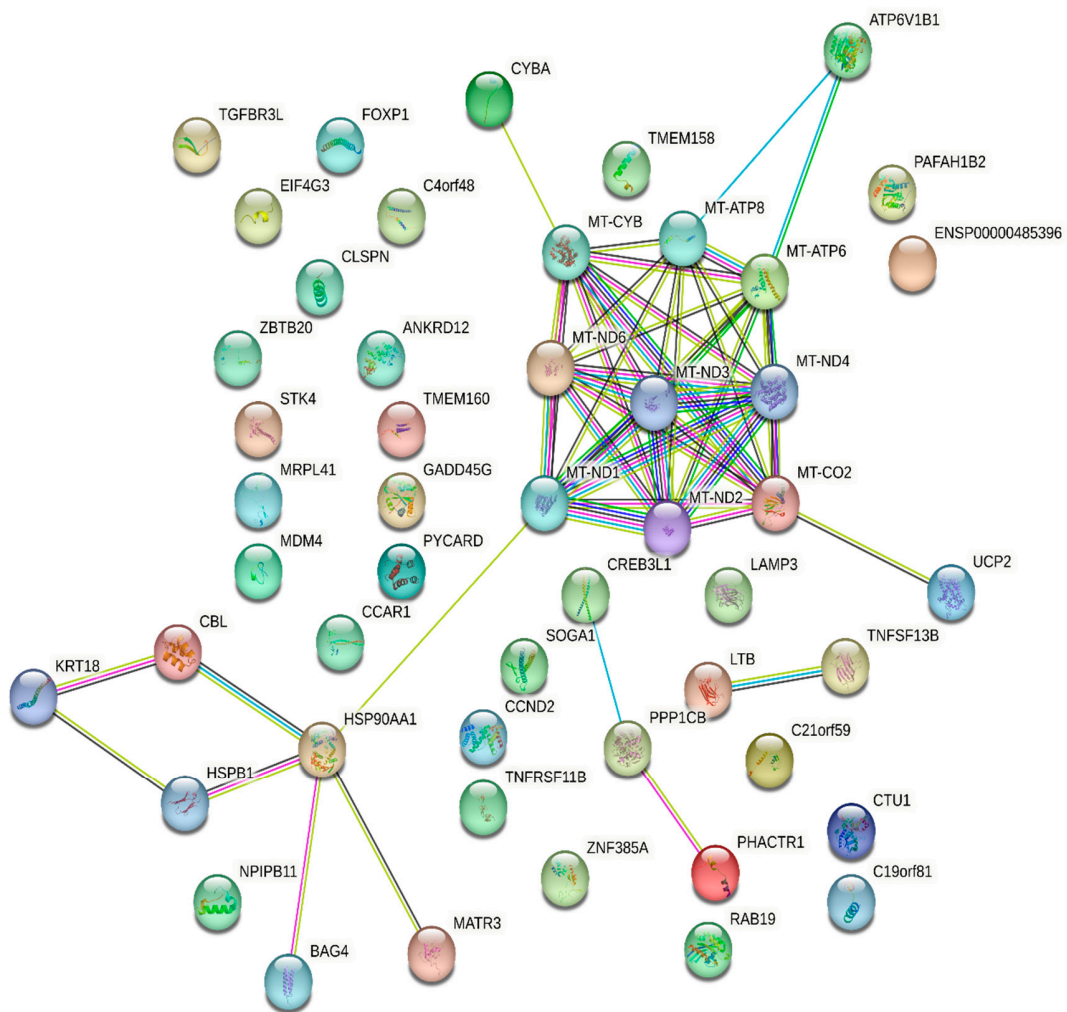

**Figure S11.** Protein-protein interaction network constructed using STRING (Search Tool for the Retrieval of Interacting Genes; version 11.5; <https://string-db.org>) with significantly downregulated DEGs in ACHN cell line response to starvation induced autophagy and cisplatin.



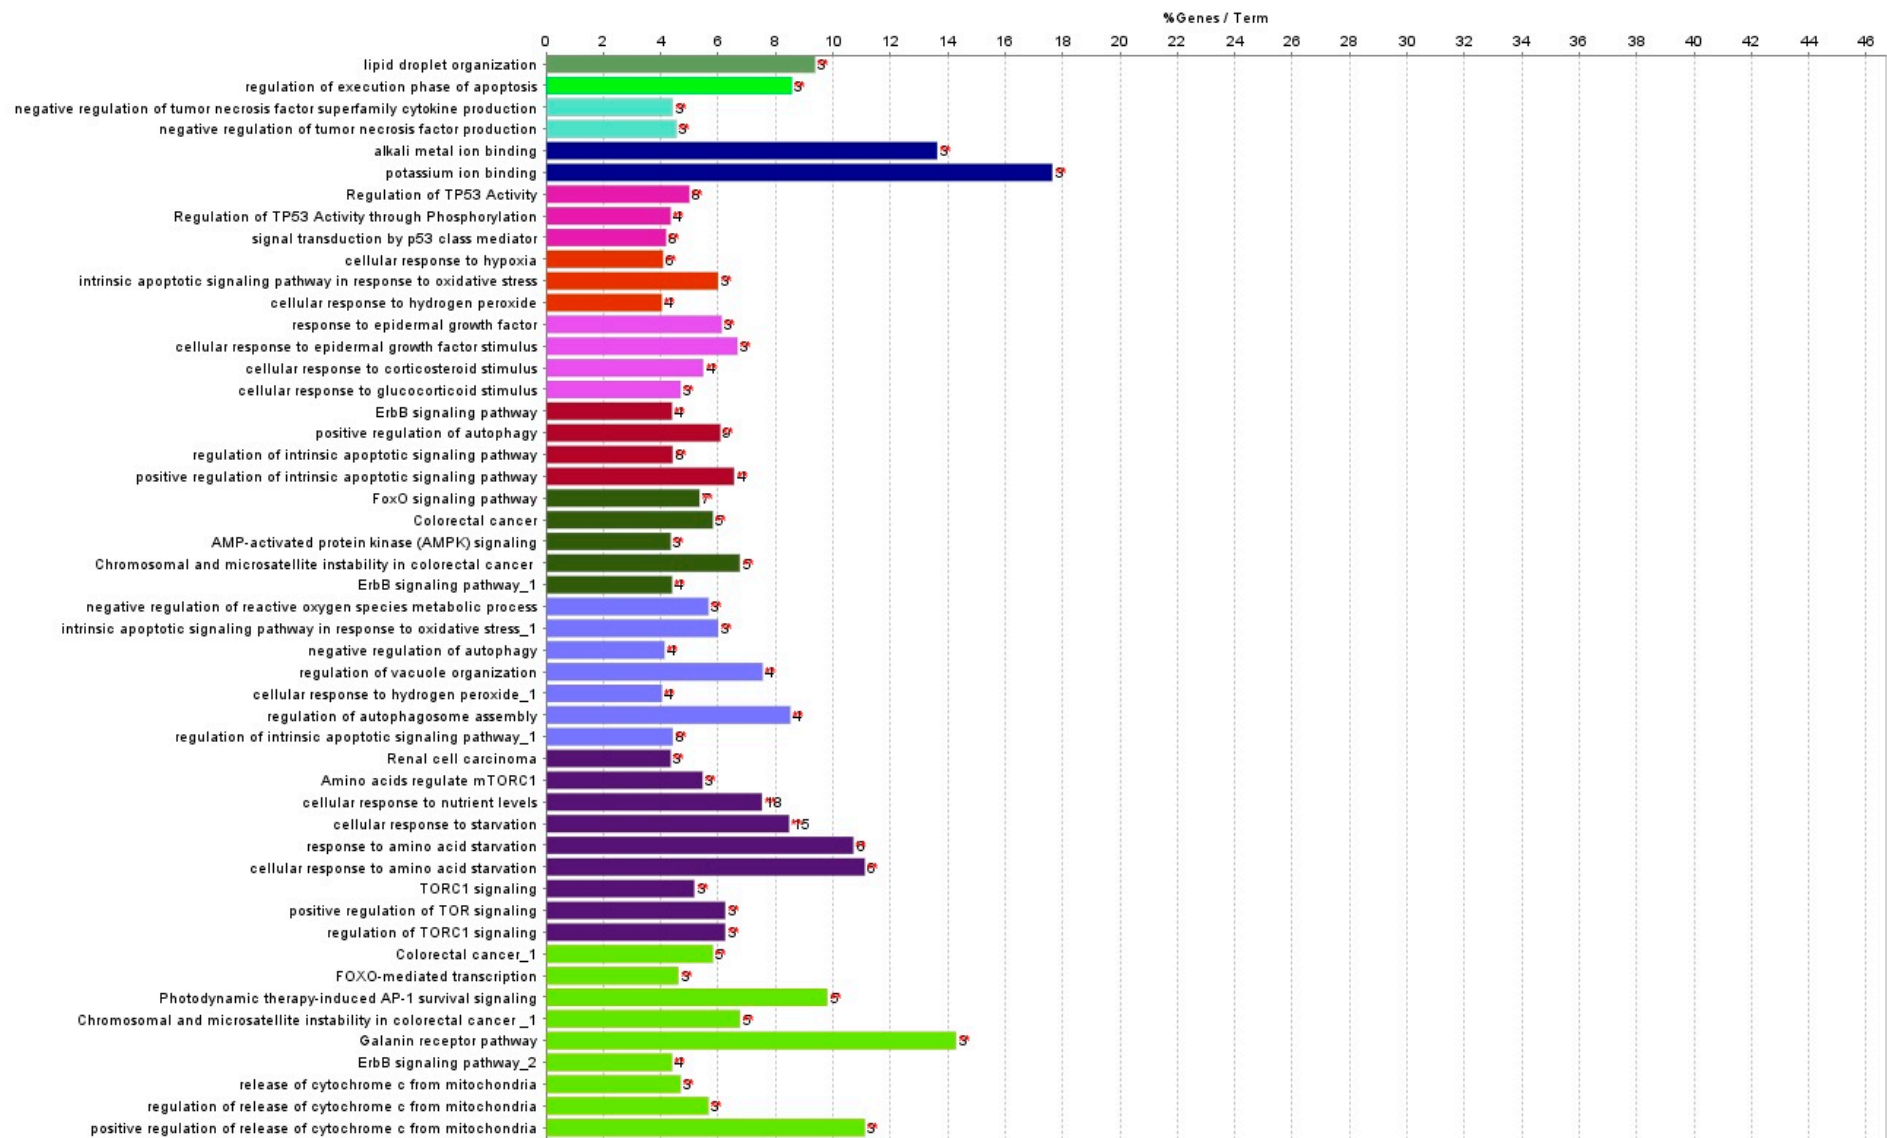

Bar plot continue

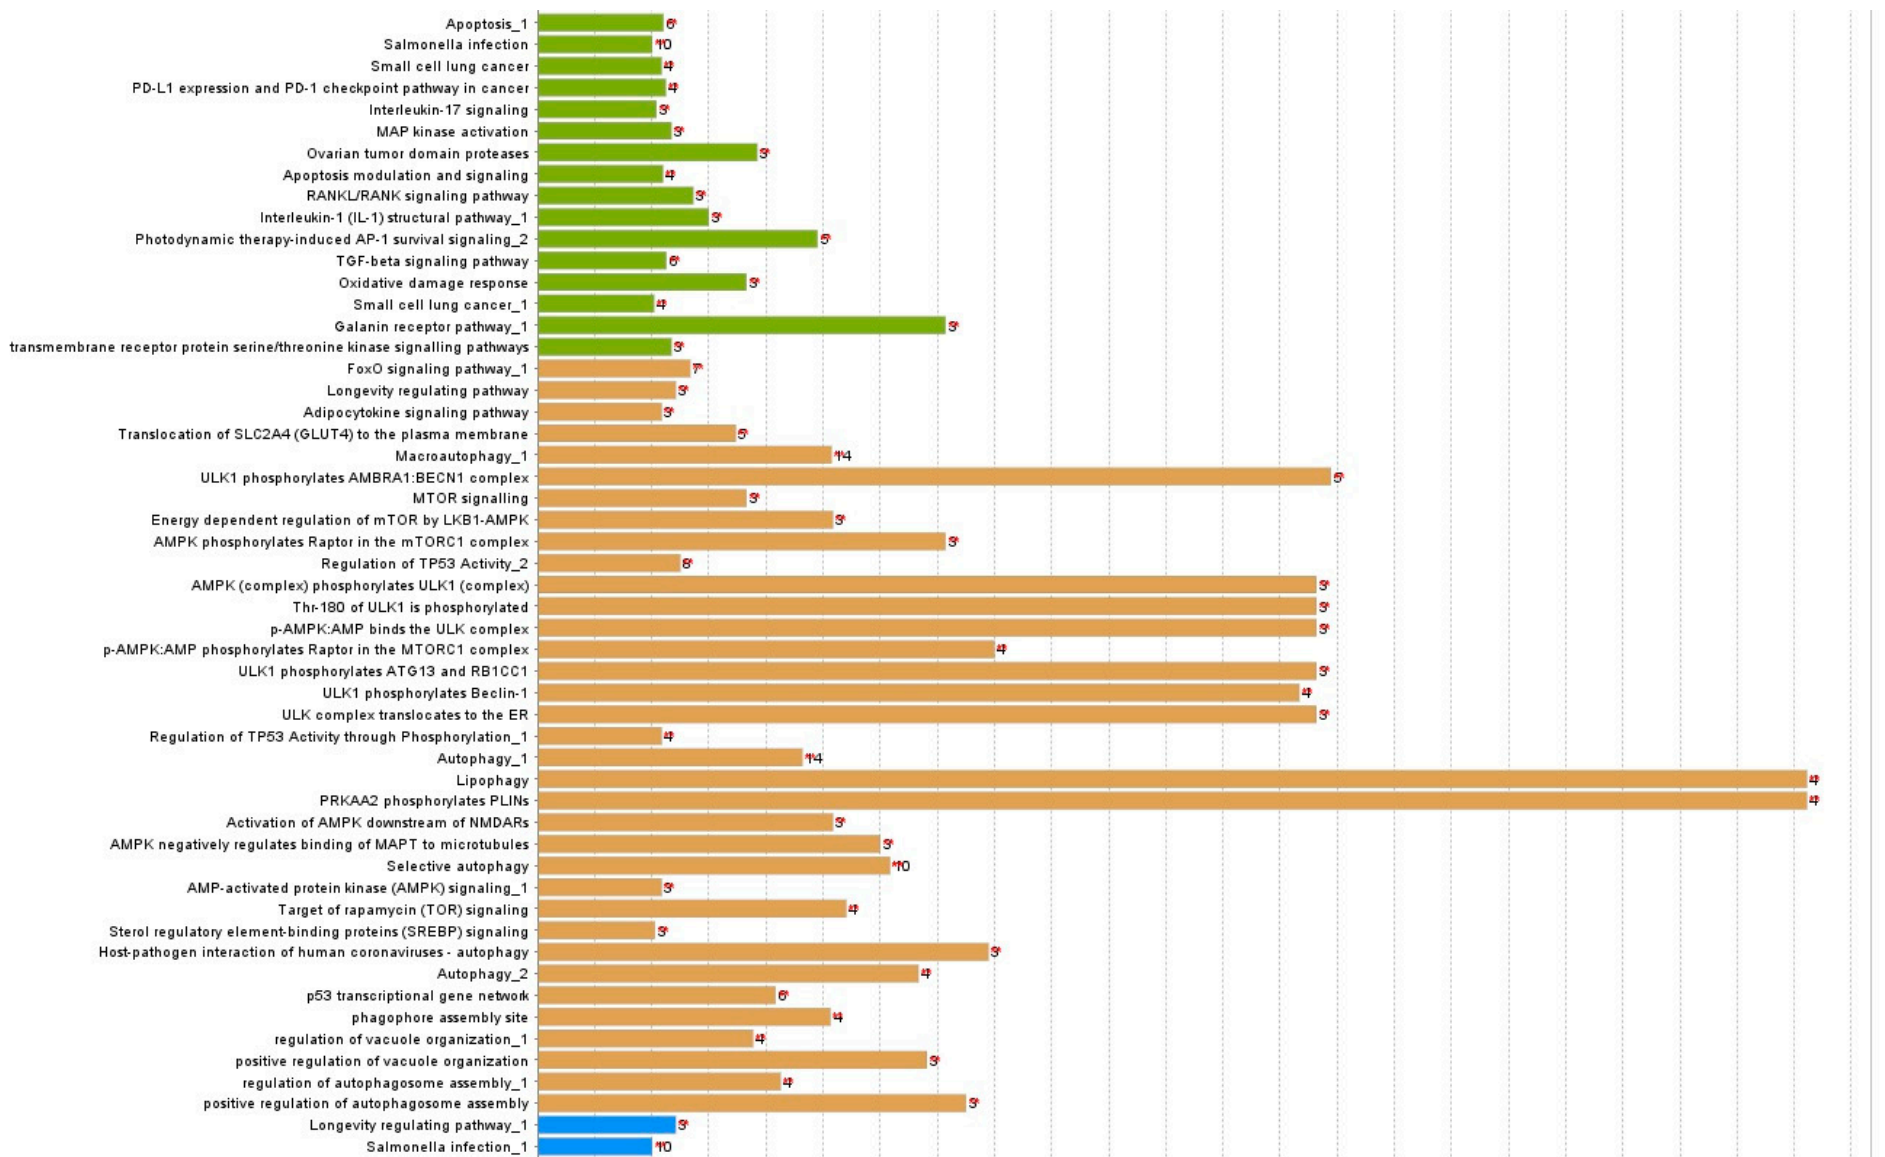

Bar plot continue

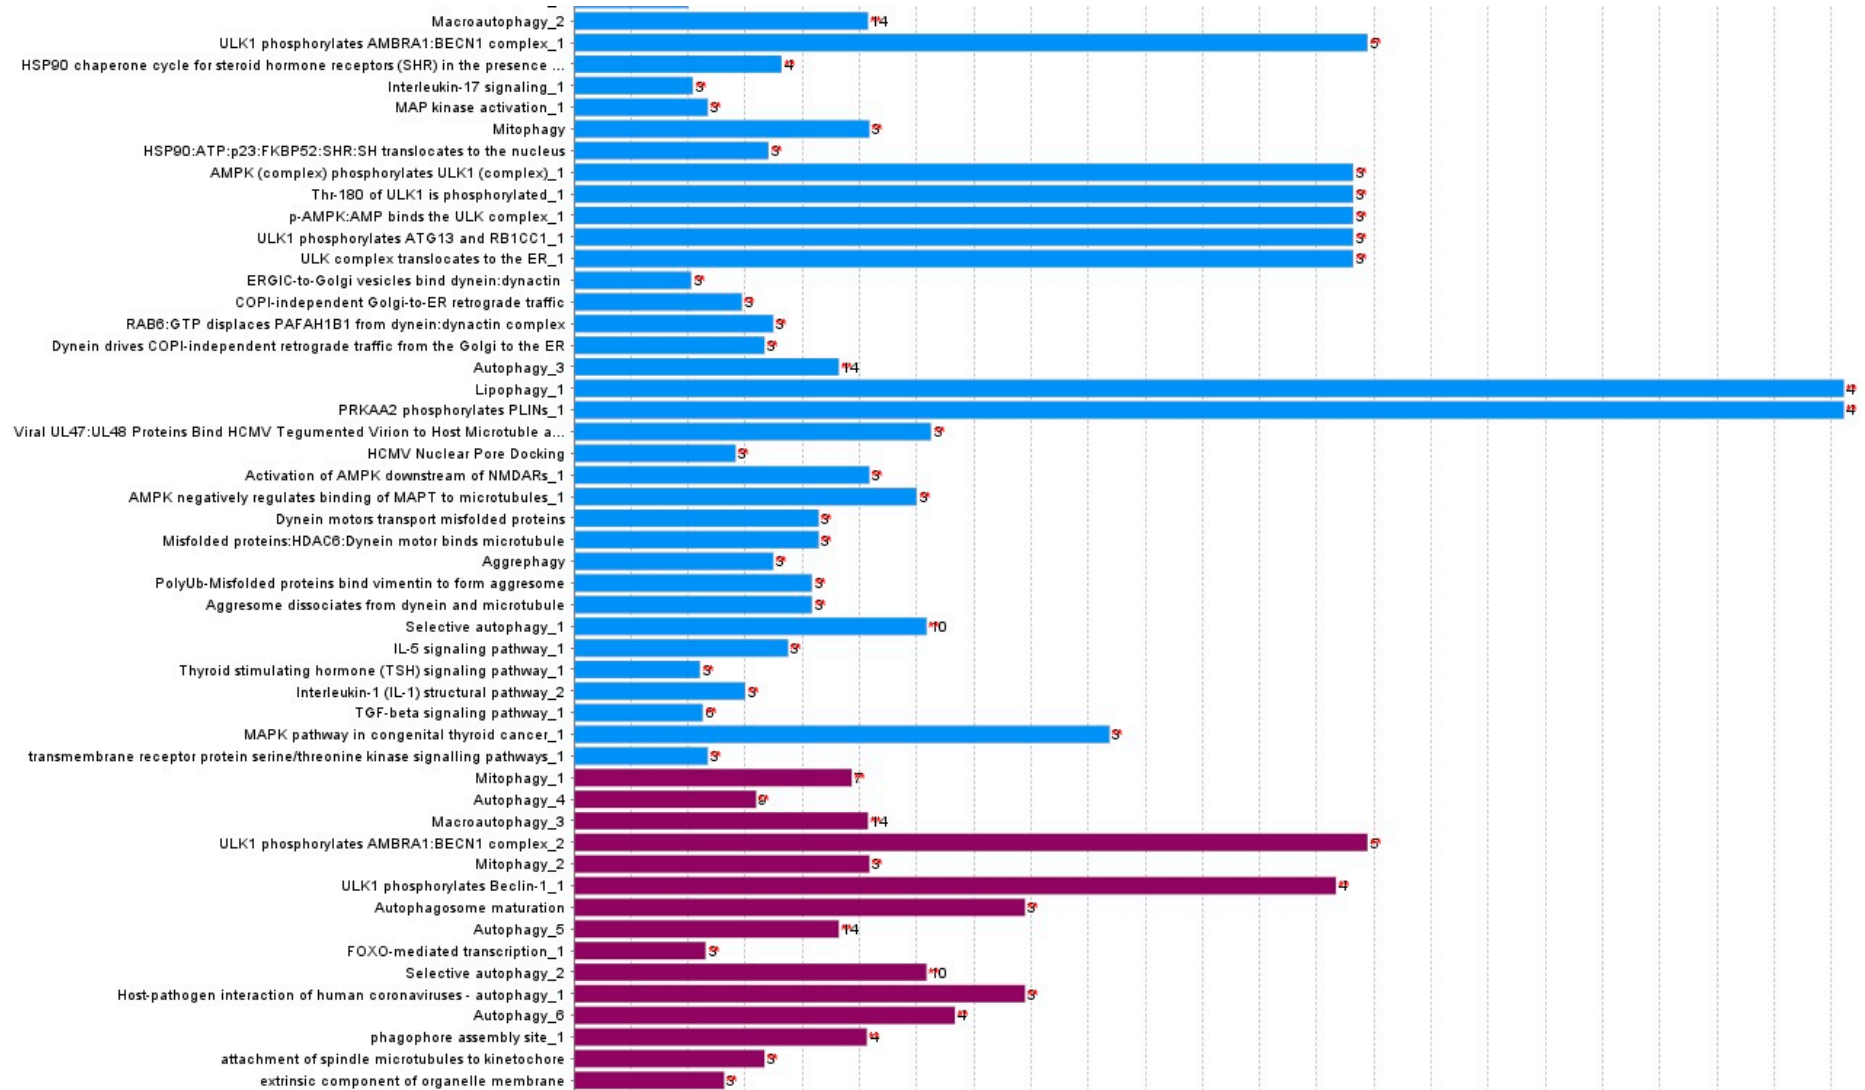

Bar plot continue

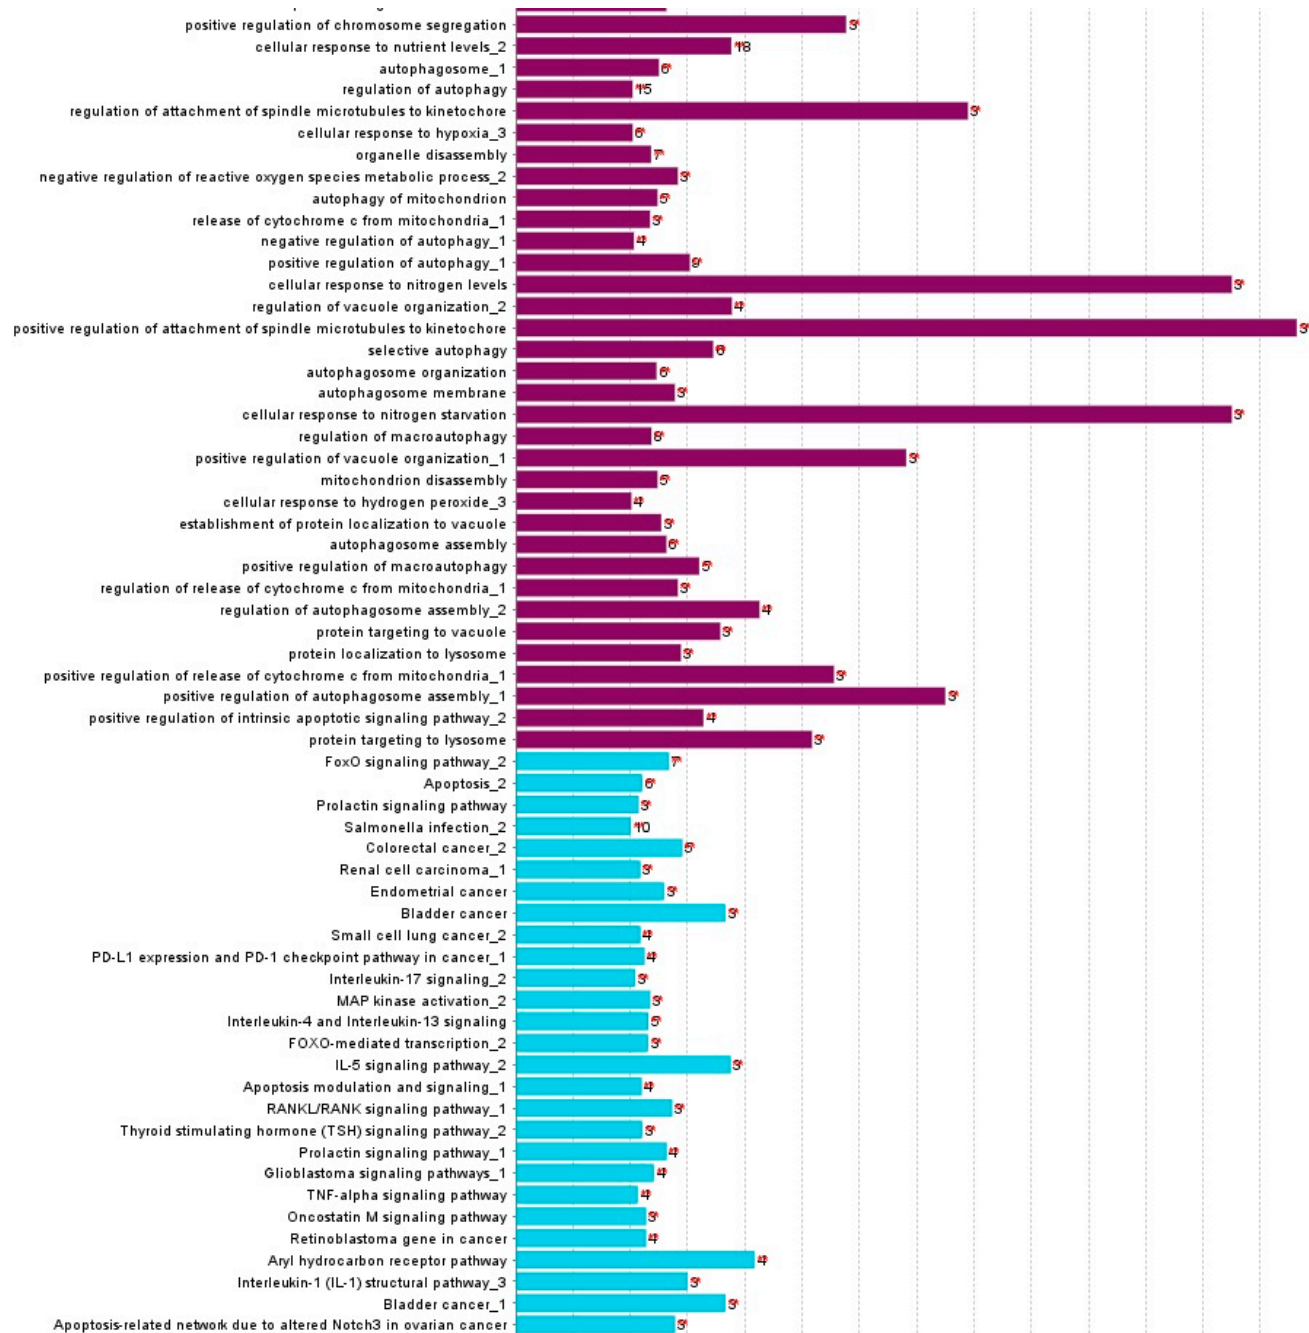

Bar plot continue



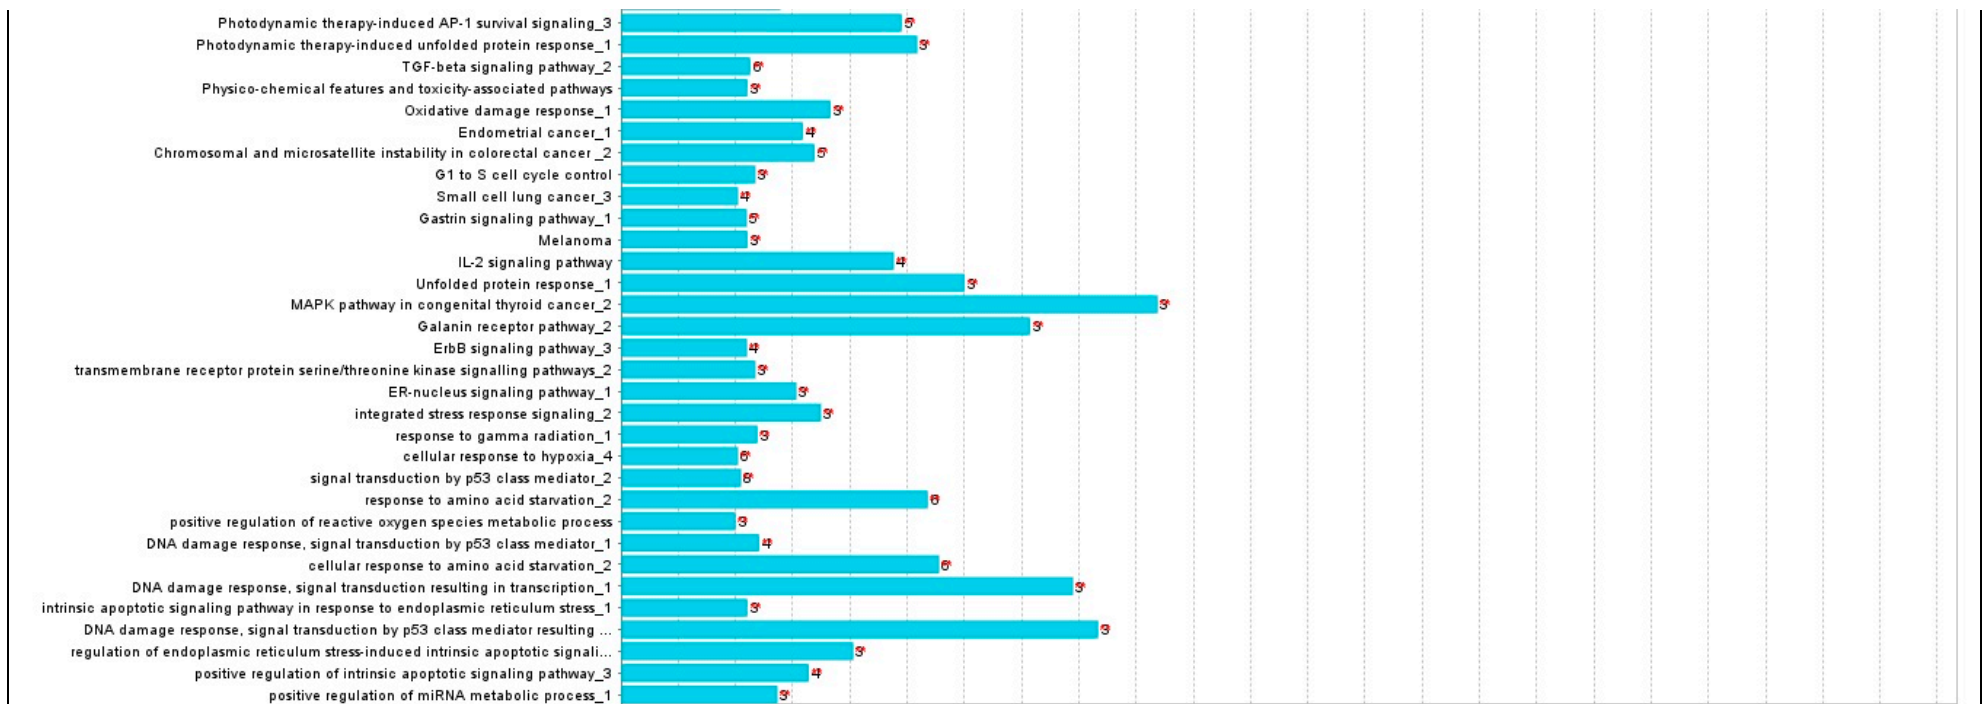

**Figure S12.** Enriched pathways in ACHN cell line response to starvation induced autophagy and cisplatin, constructed from all the upregulated PPI networks using Cytoscape plugin ClueGO (v3.9.1). The significantly enriched pathways are denoted by different colors.



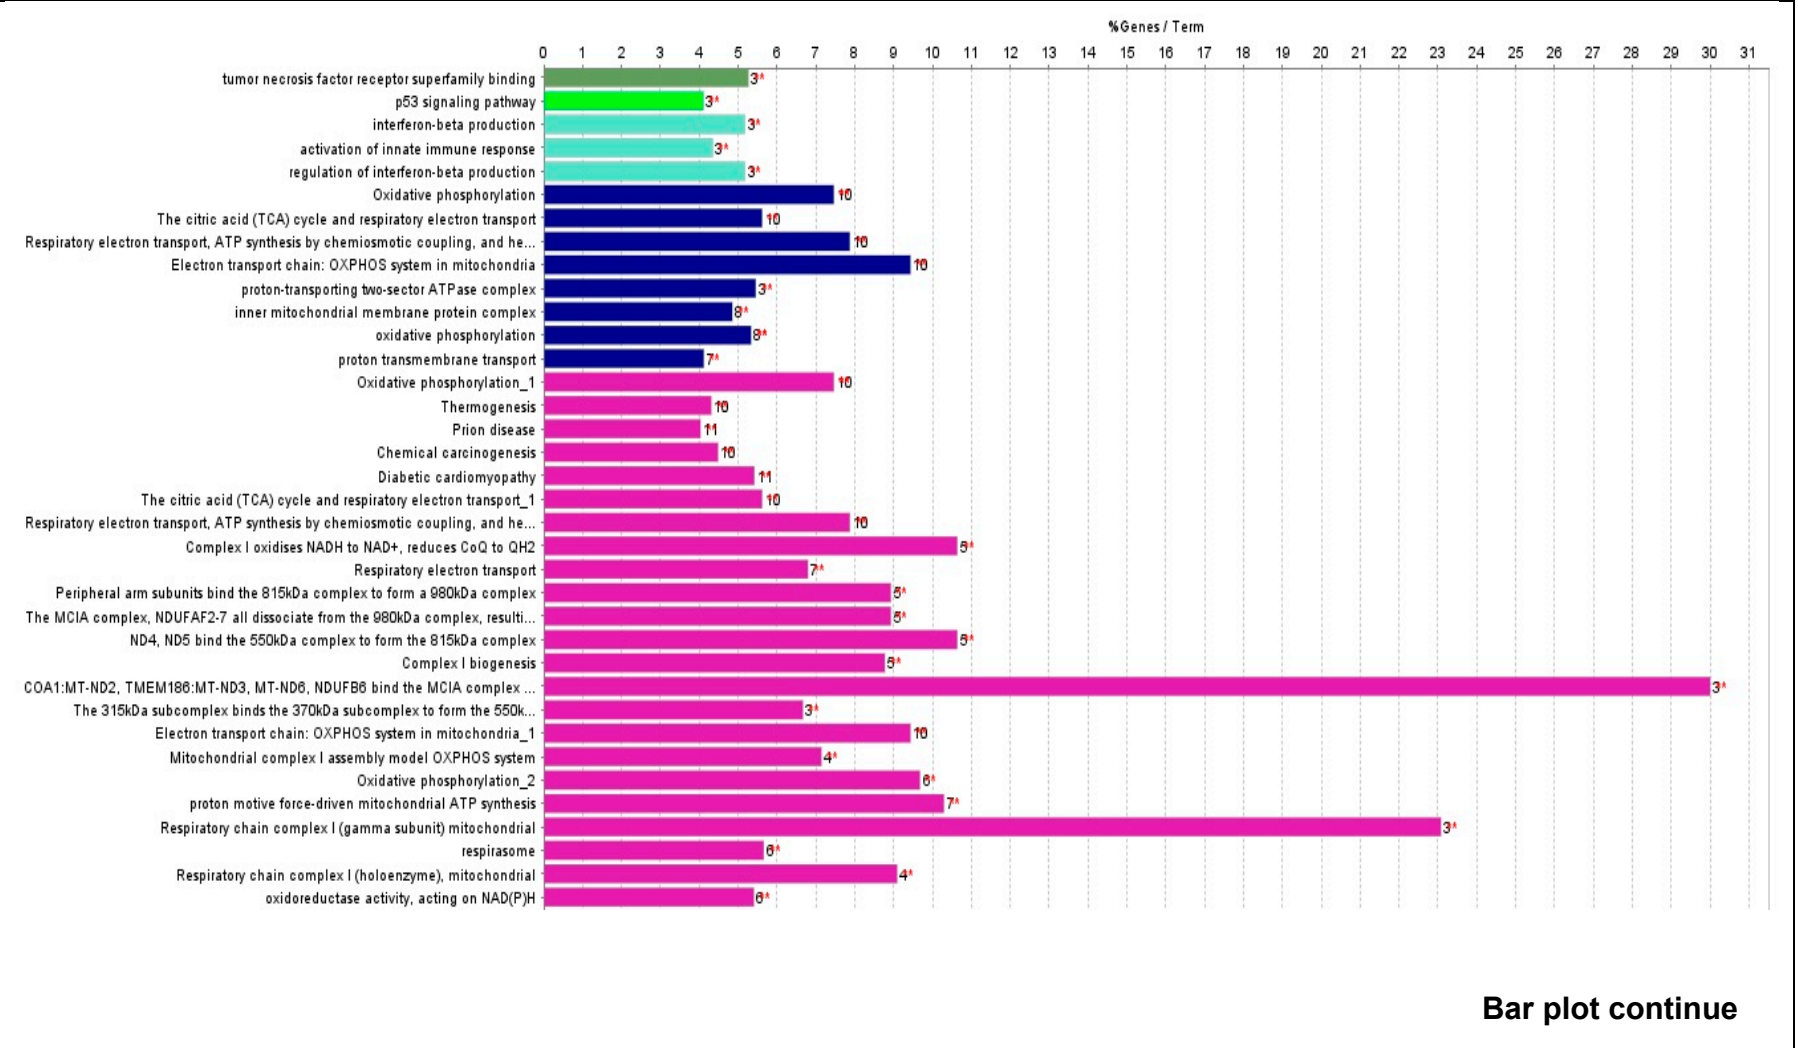

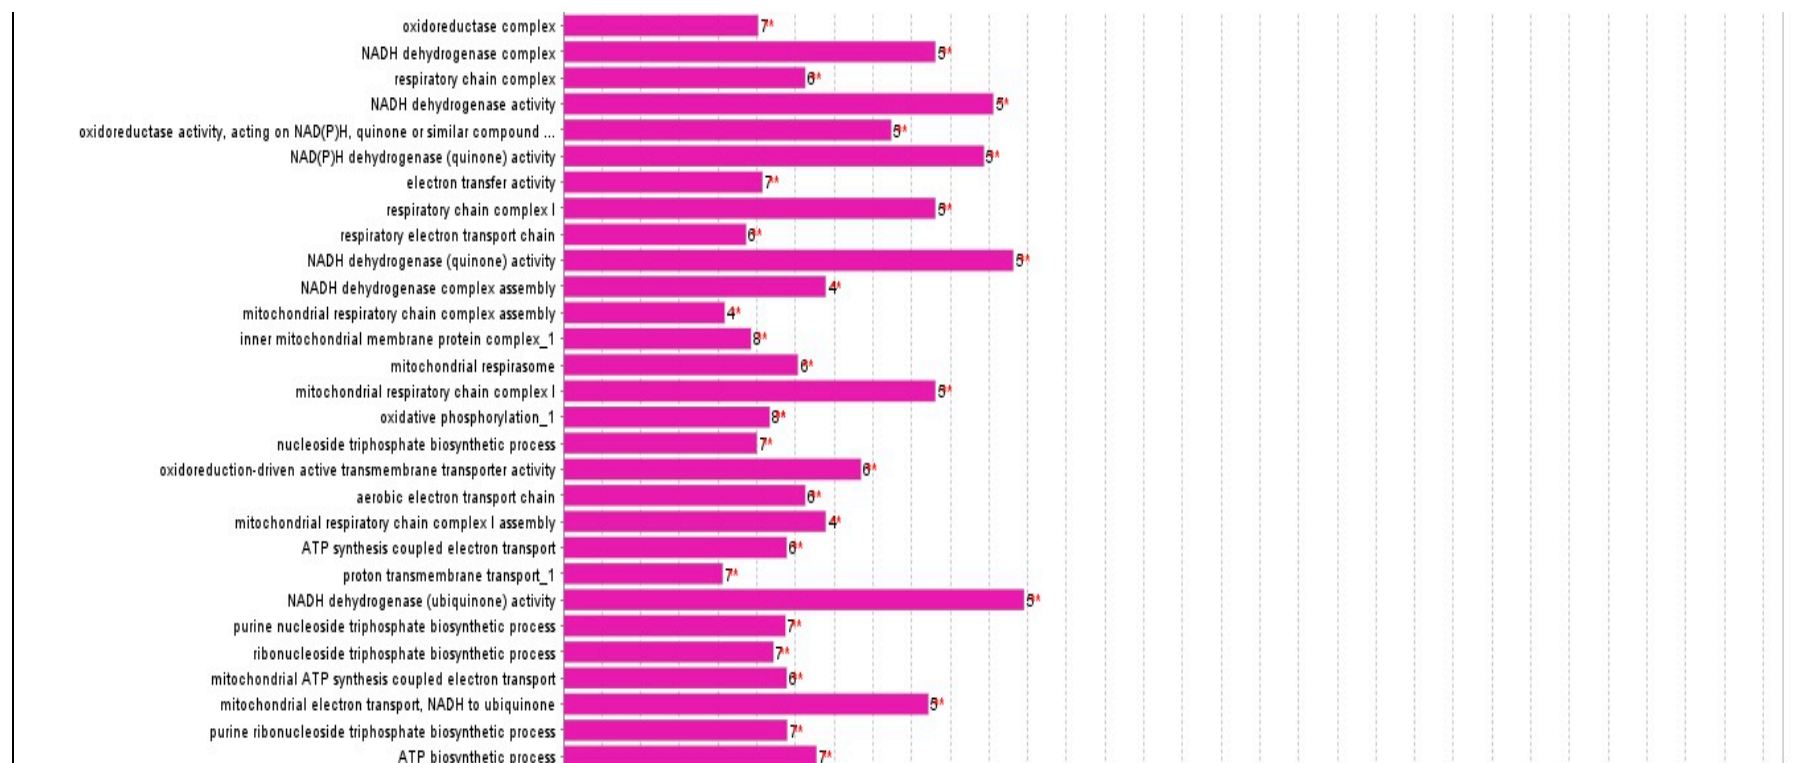

**Figure S14.** Enriched pathways in ACHN cell line response to starvation induced autophagy and cisplatin, constructed from all the downregulated PPI networks using Cytoscape plugin ClueGO(v3.9.1). The significantly enriched pathways are denoted by different colors.



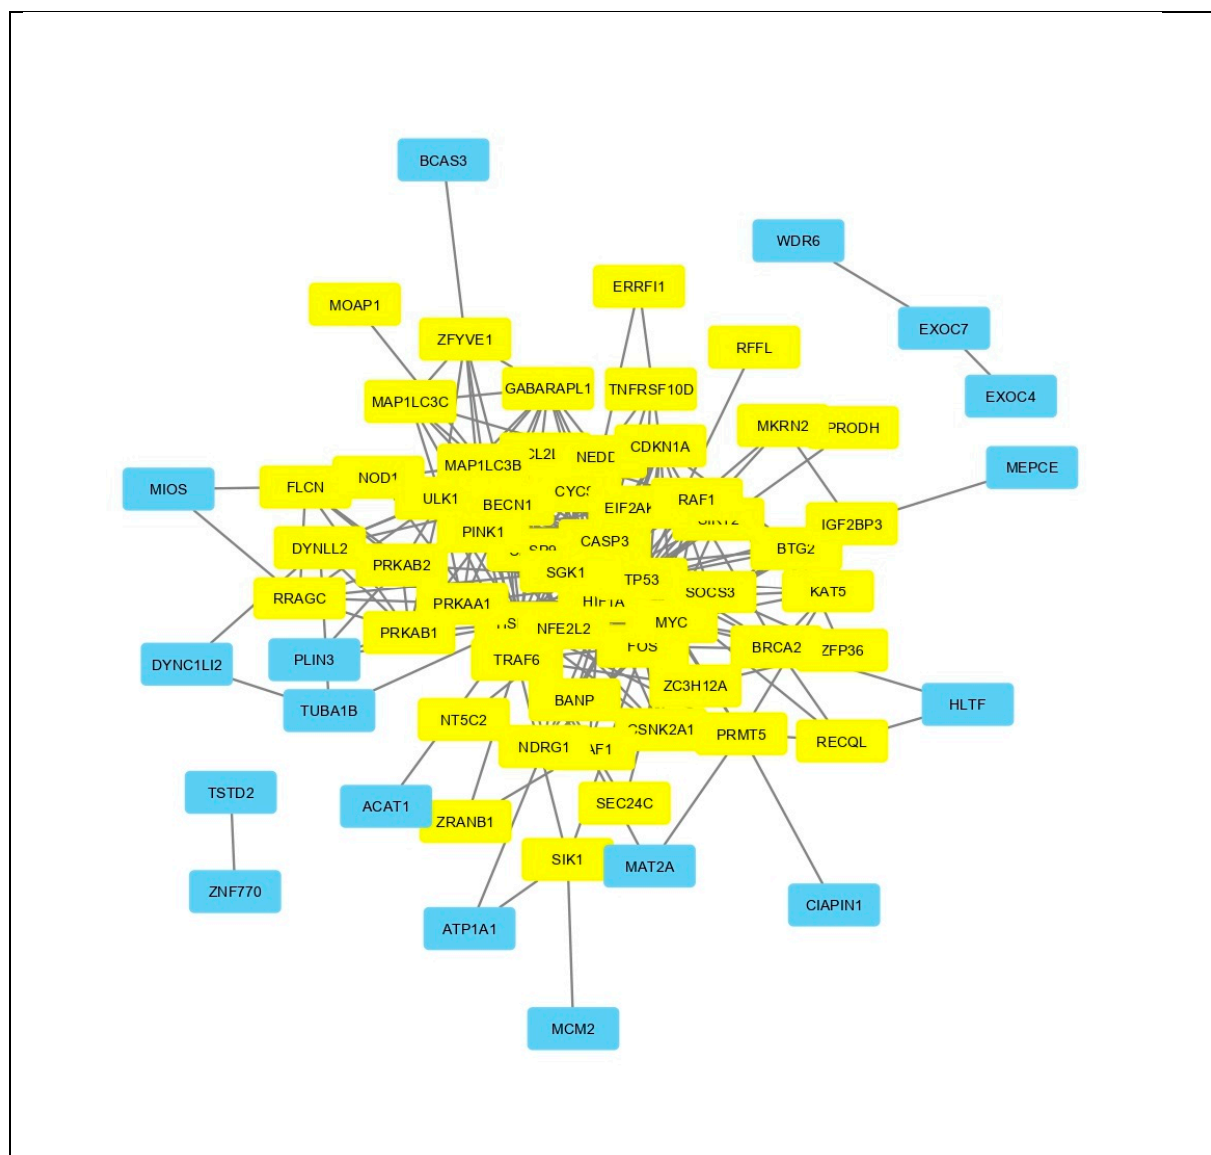

**Figure S15.** MCODE Cluster 1 generated with all the upregulated DEGs using Cytoscape plugin MCODE. Cluster 1 forms with 54 nodes and 272 edges with a cluster score of 10.56.

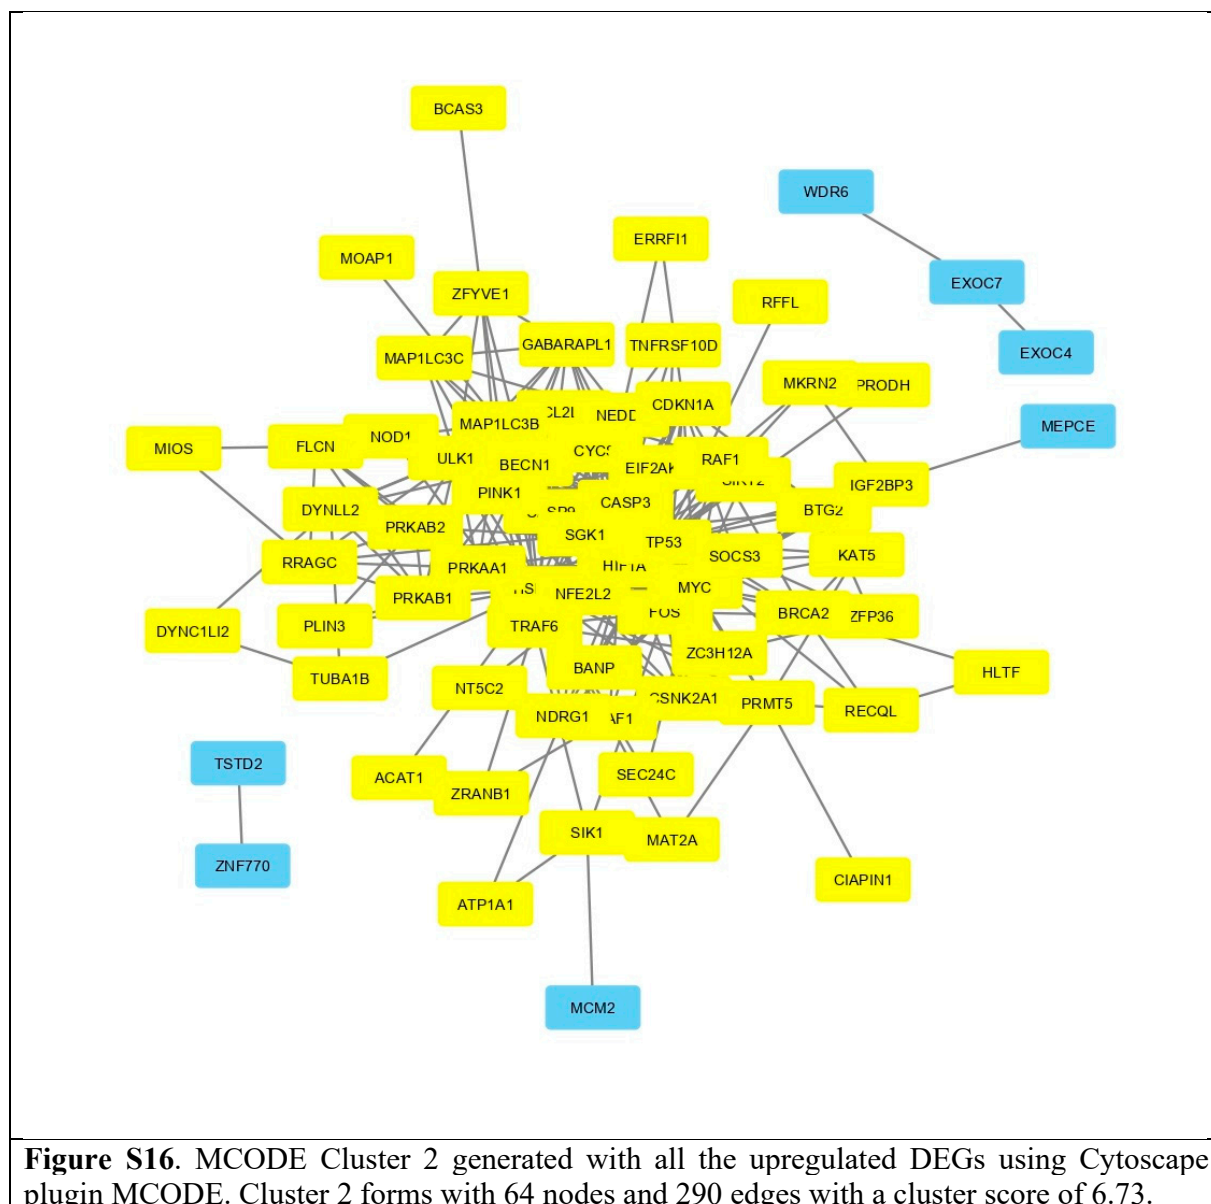

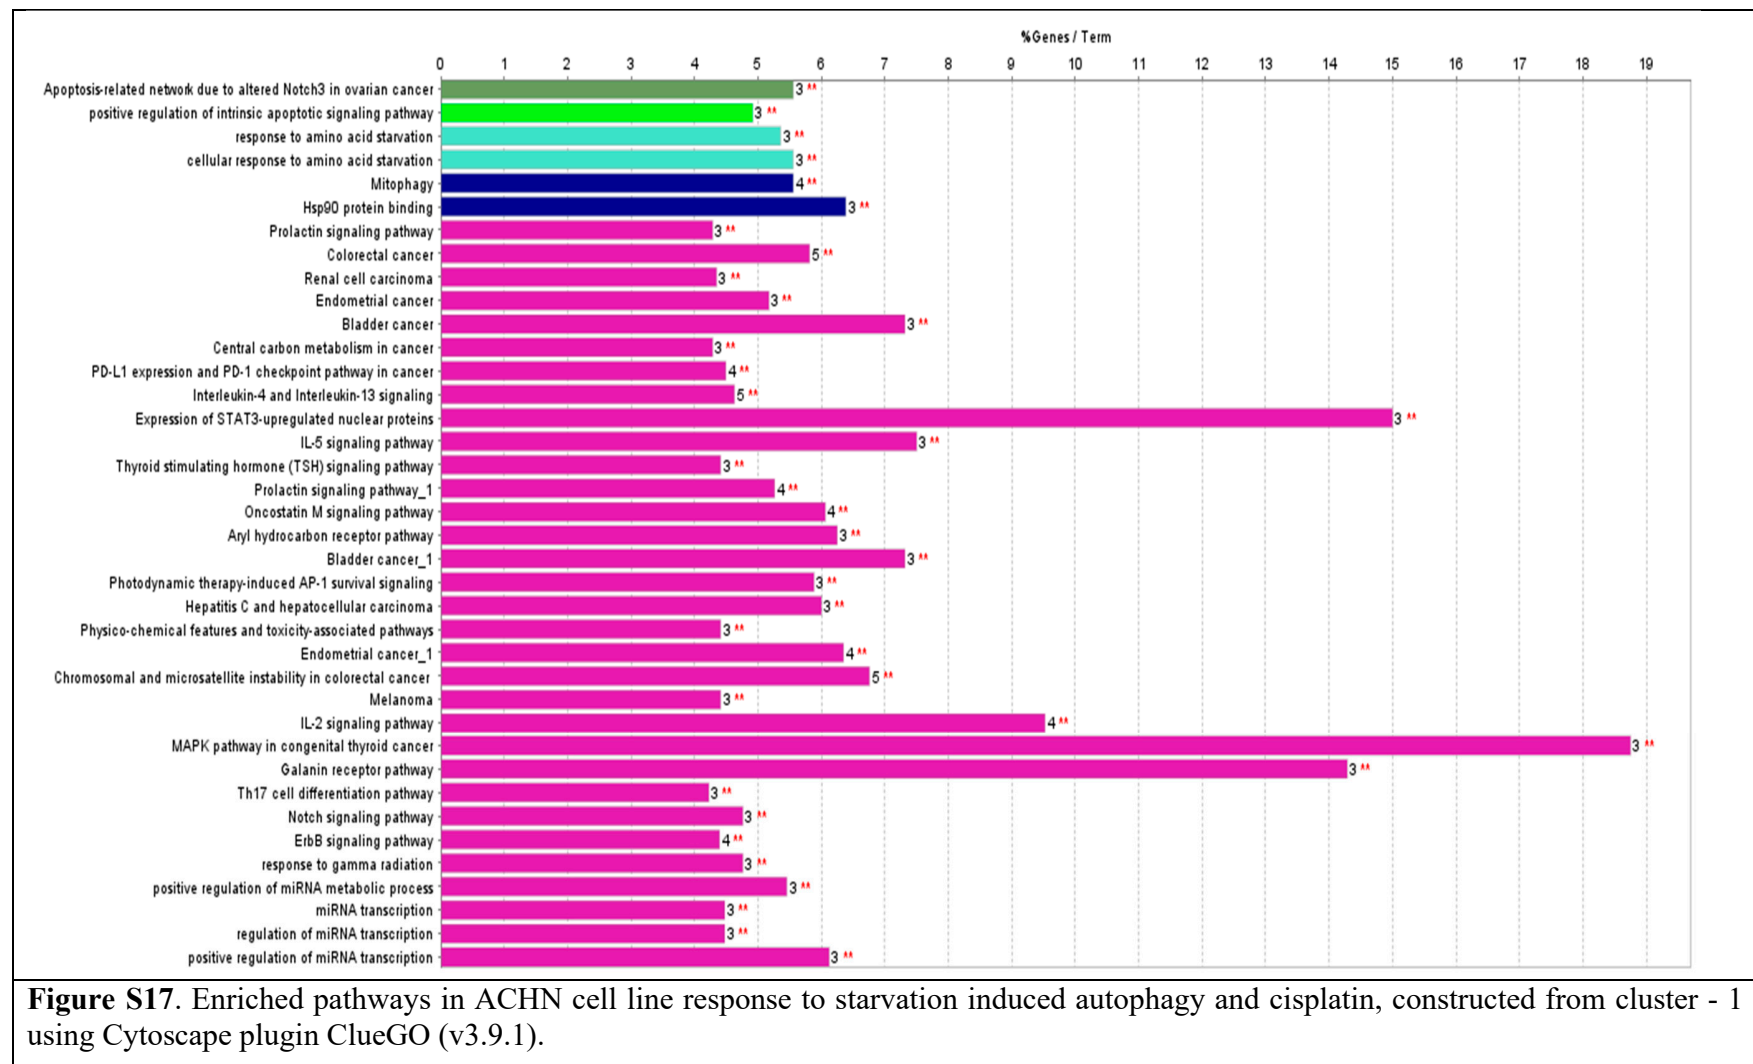

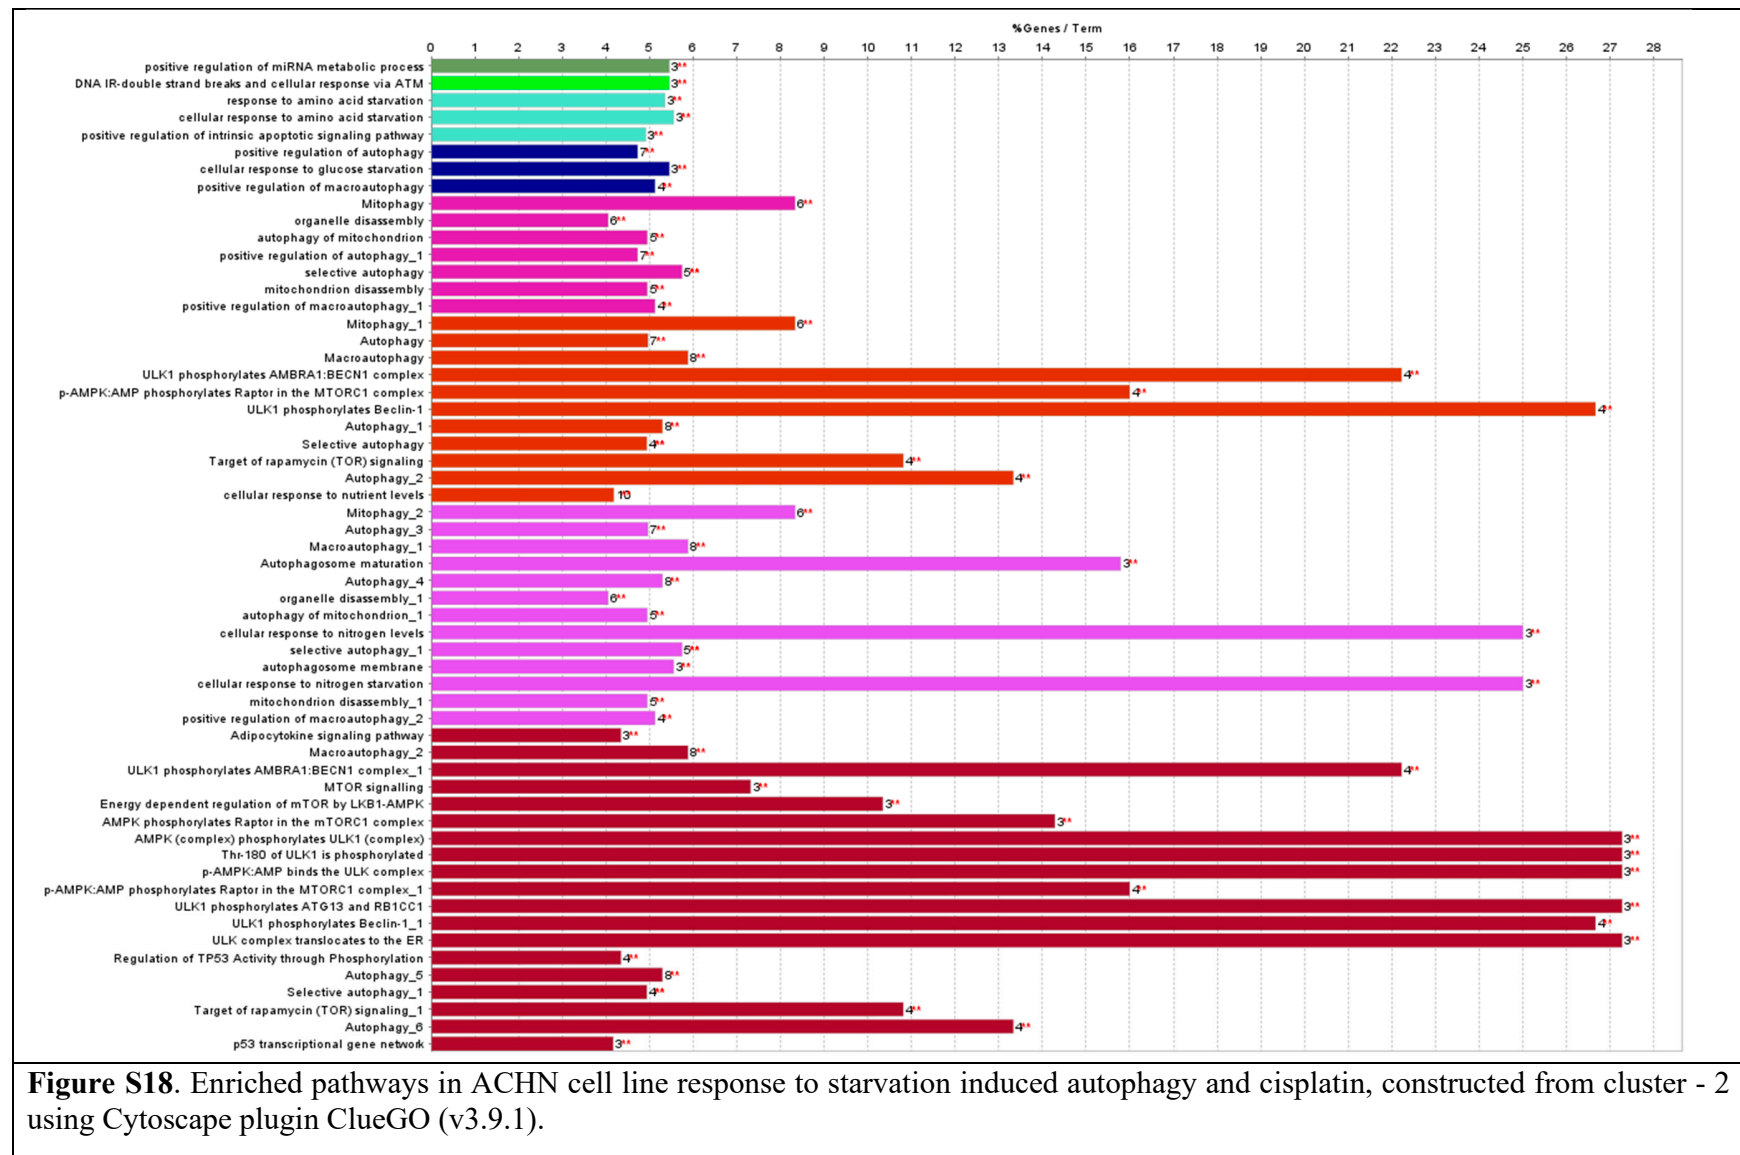

(A)

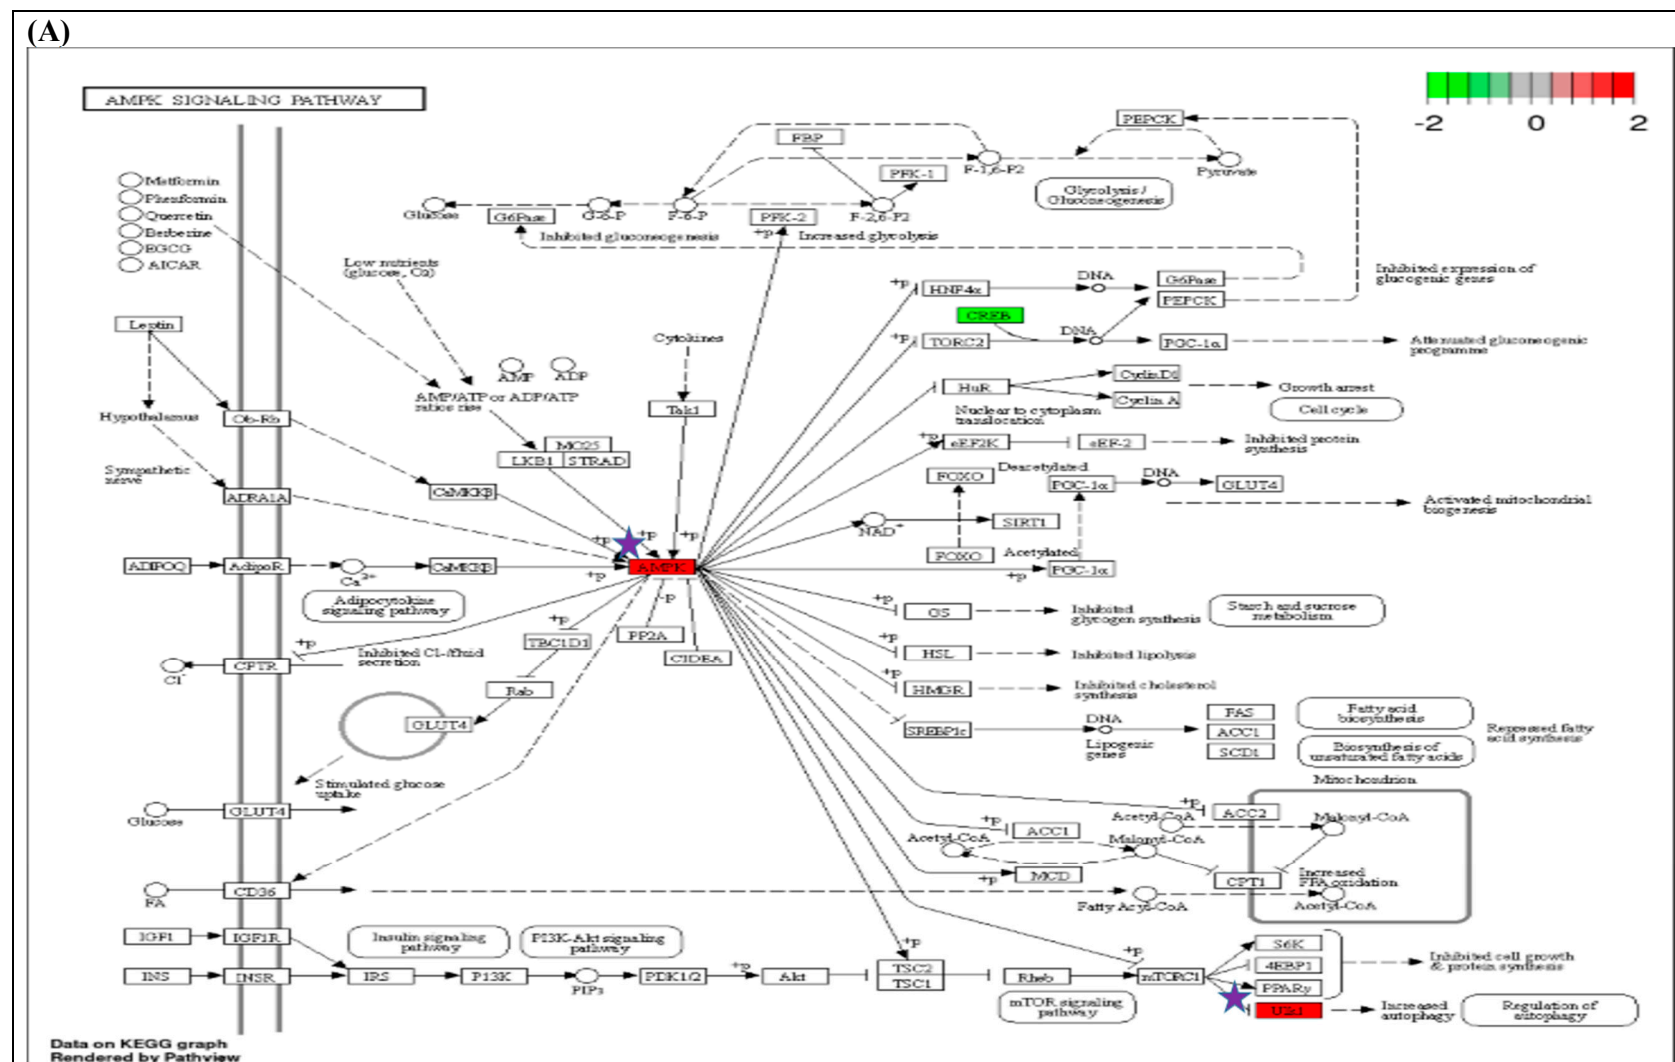

**(B)**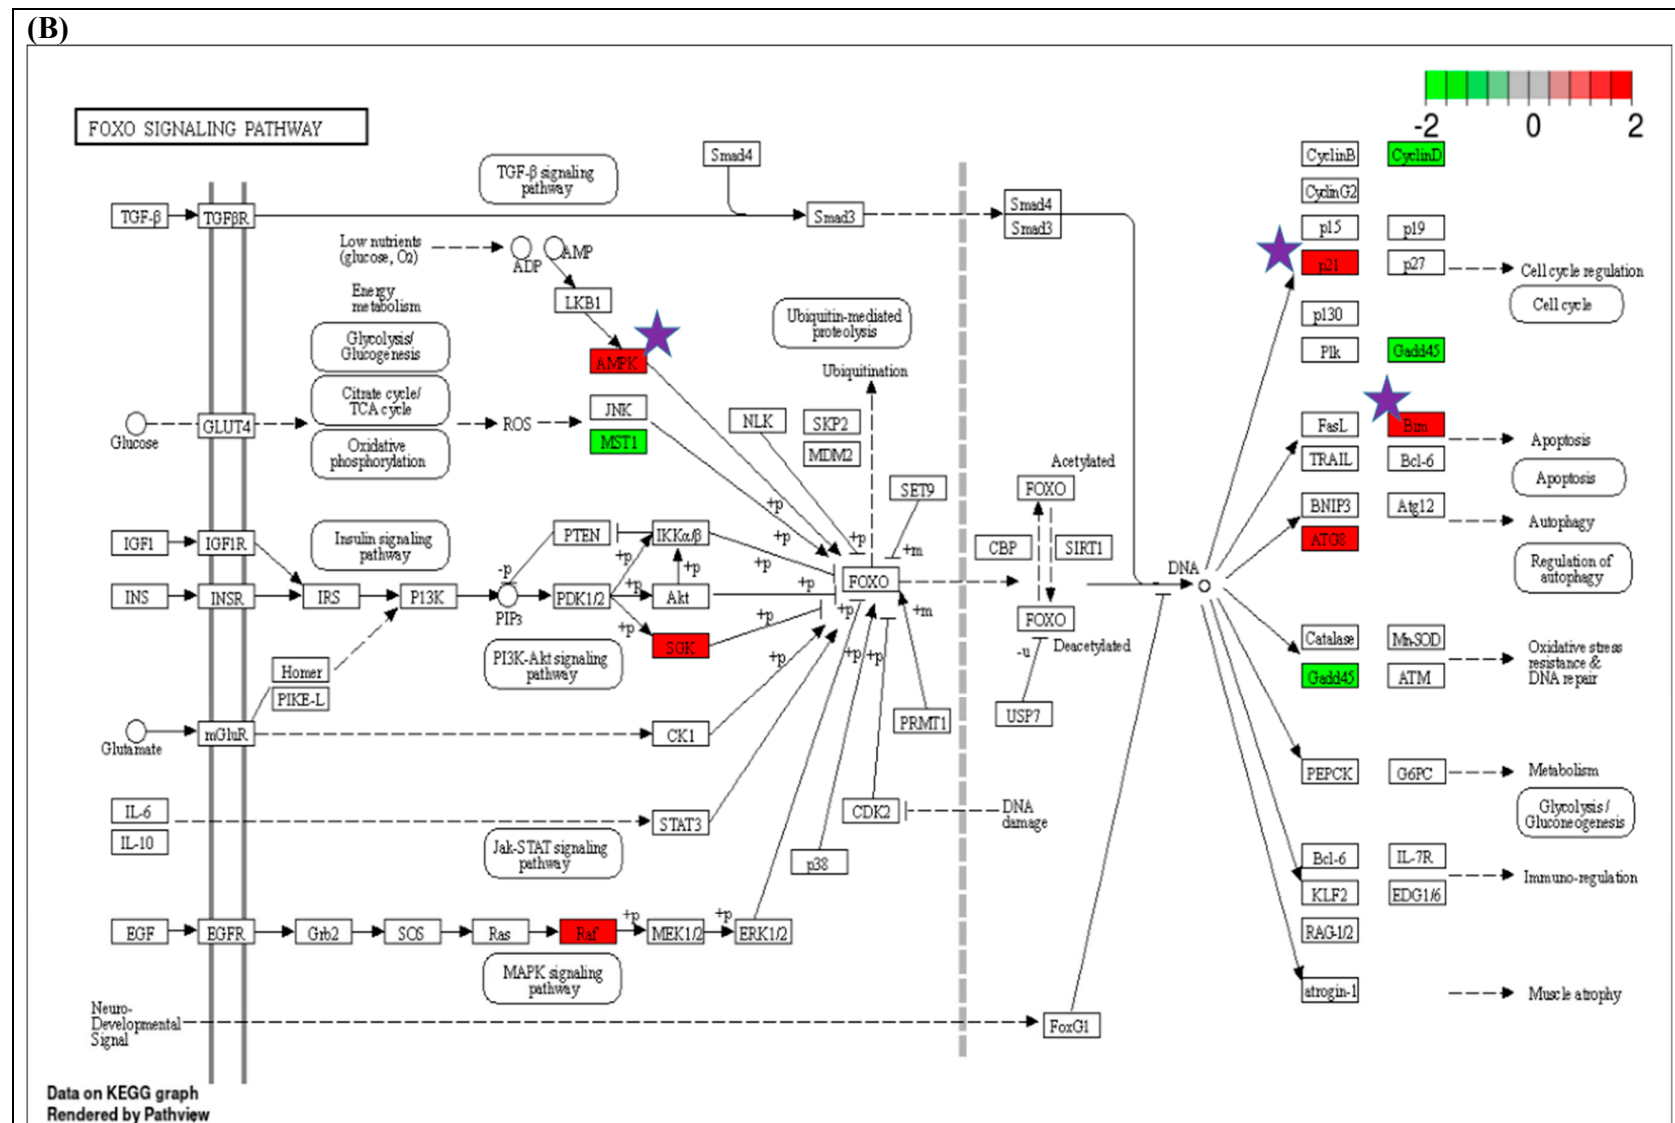

(C)

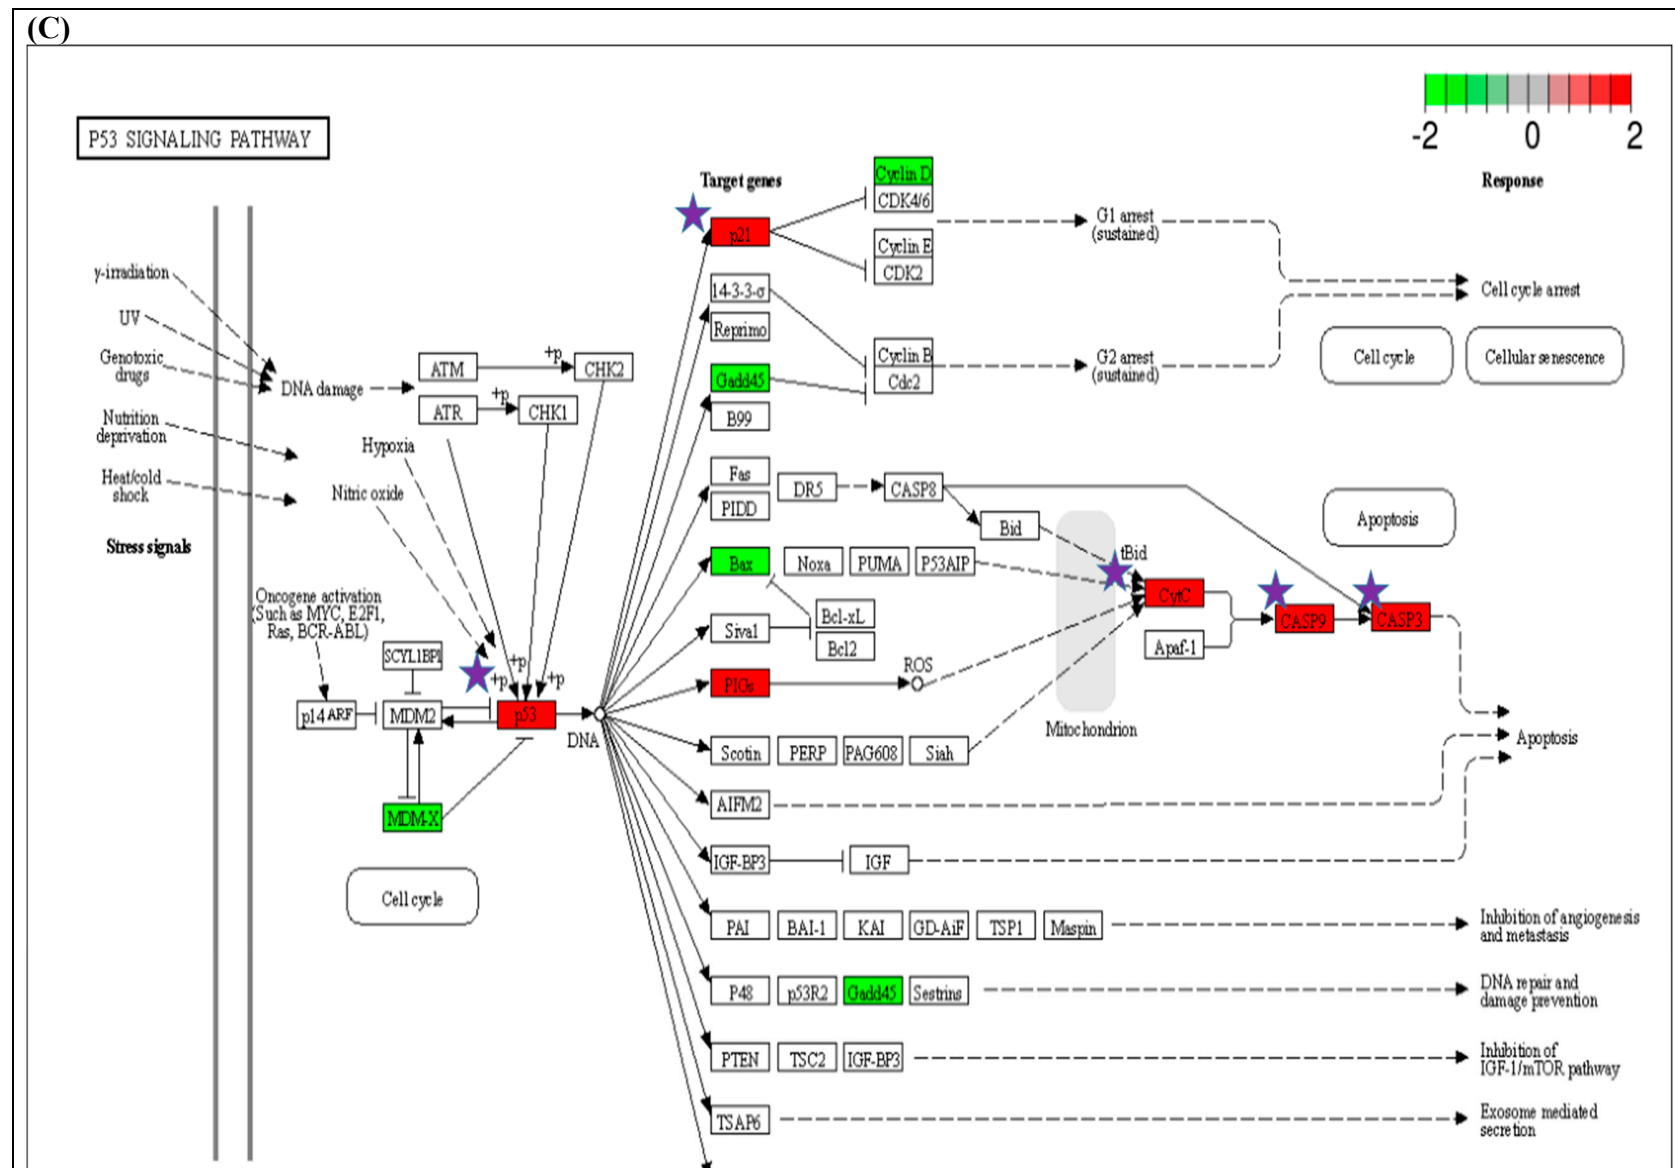



**(D)**

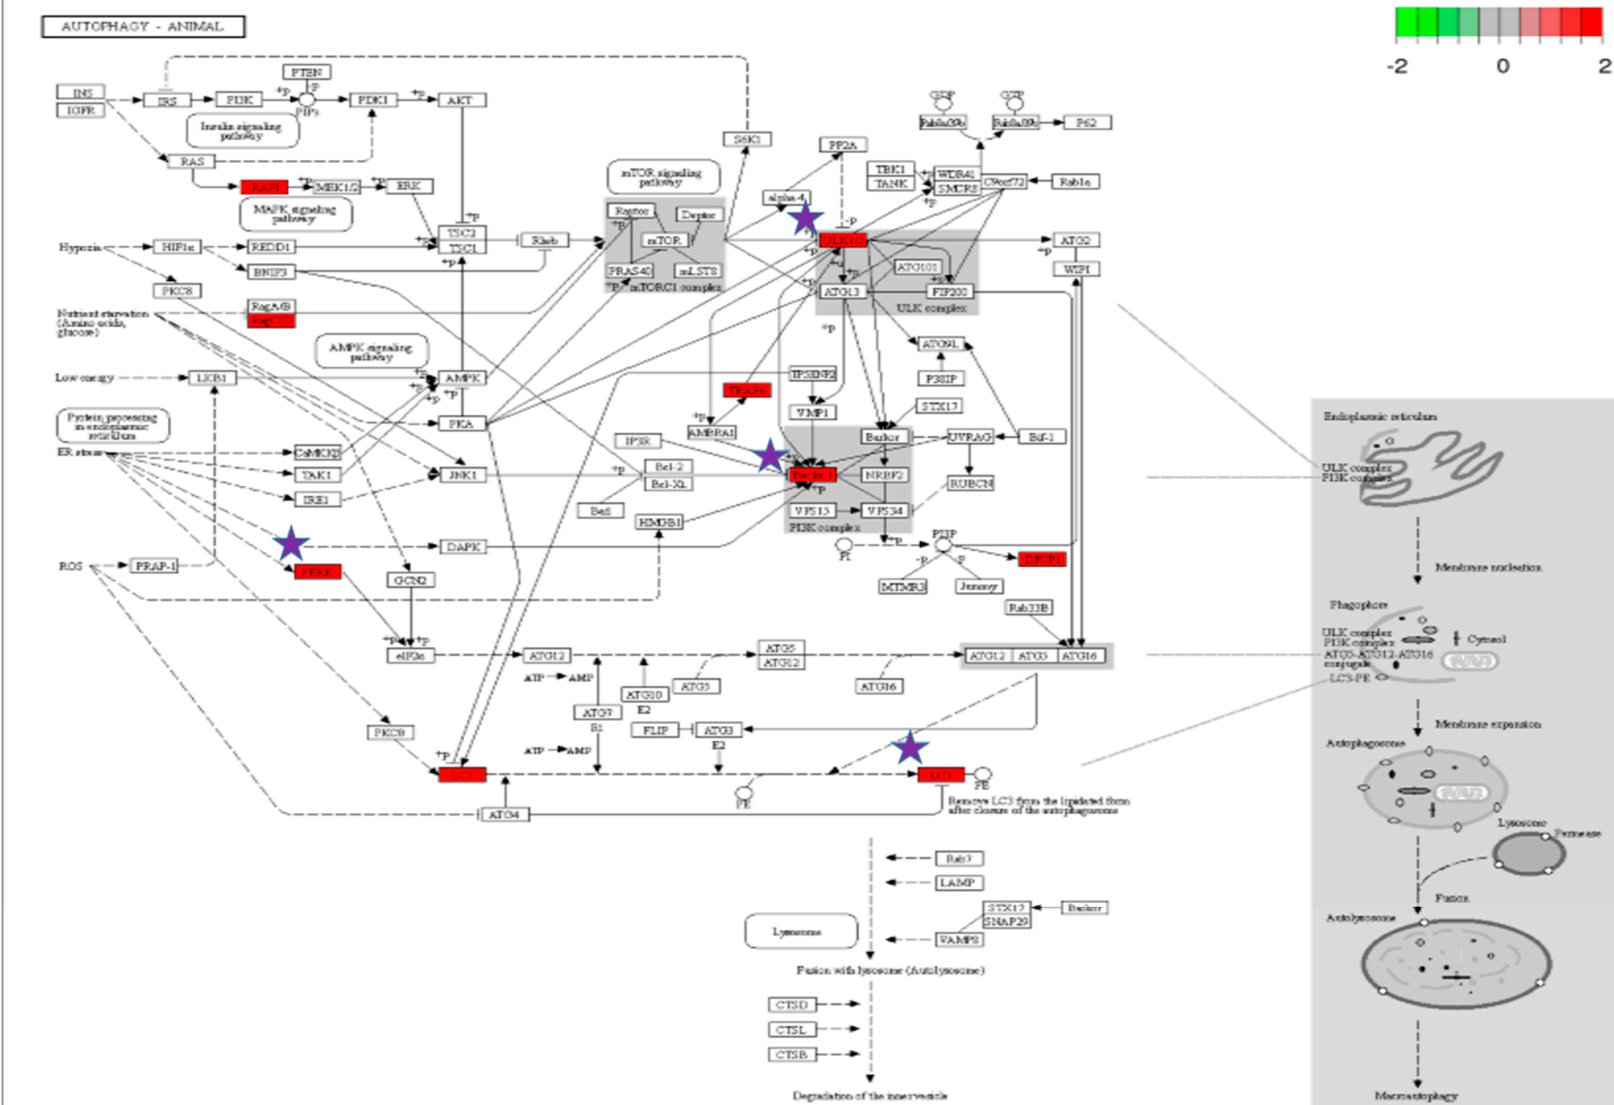

Data on KEGG graph  
Rendered by Pathview



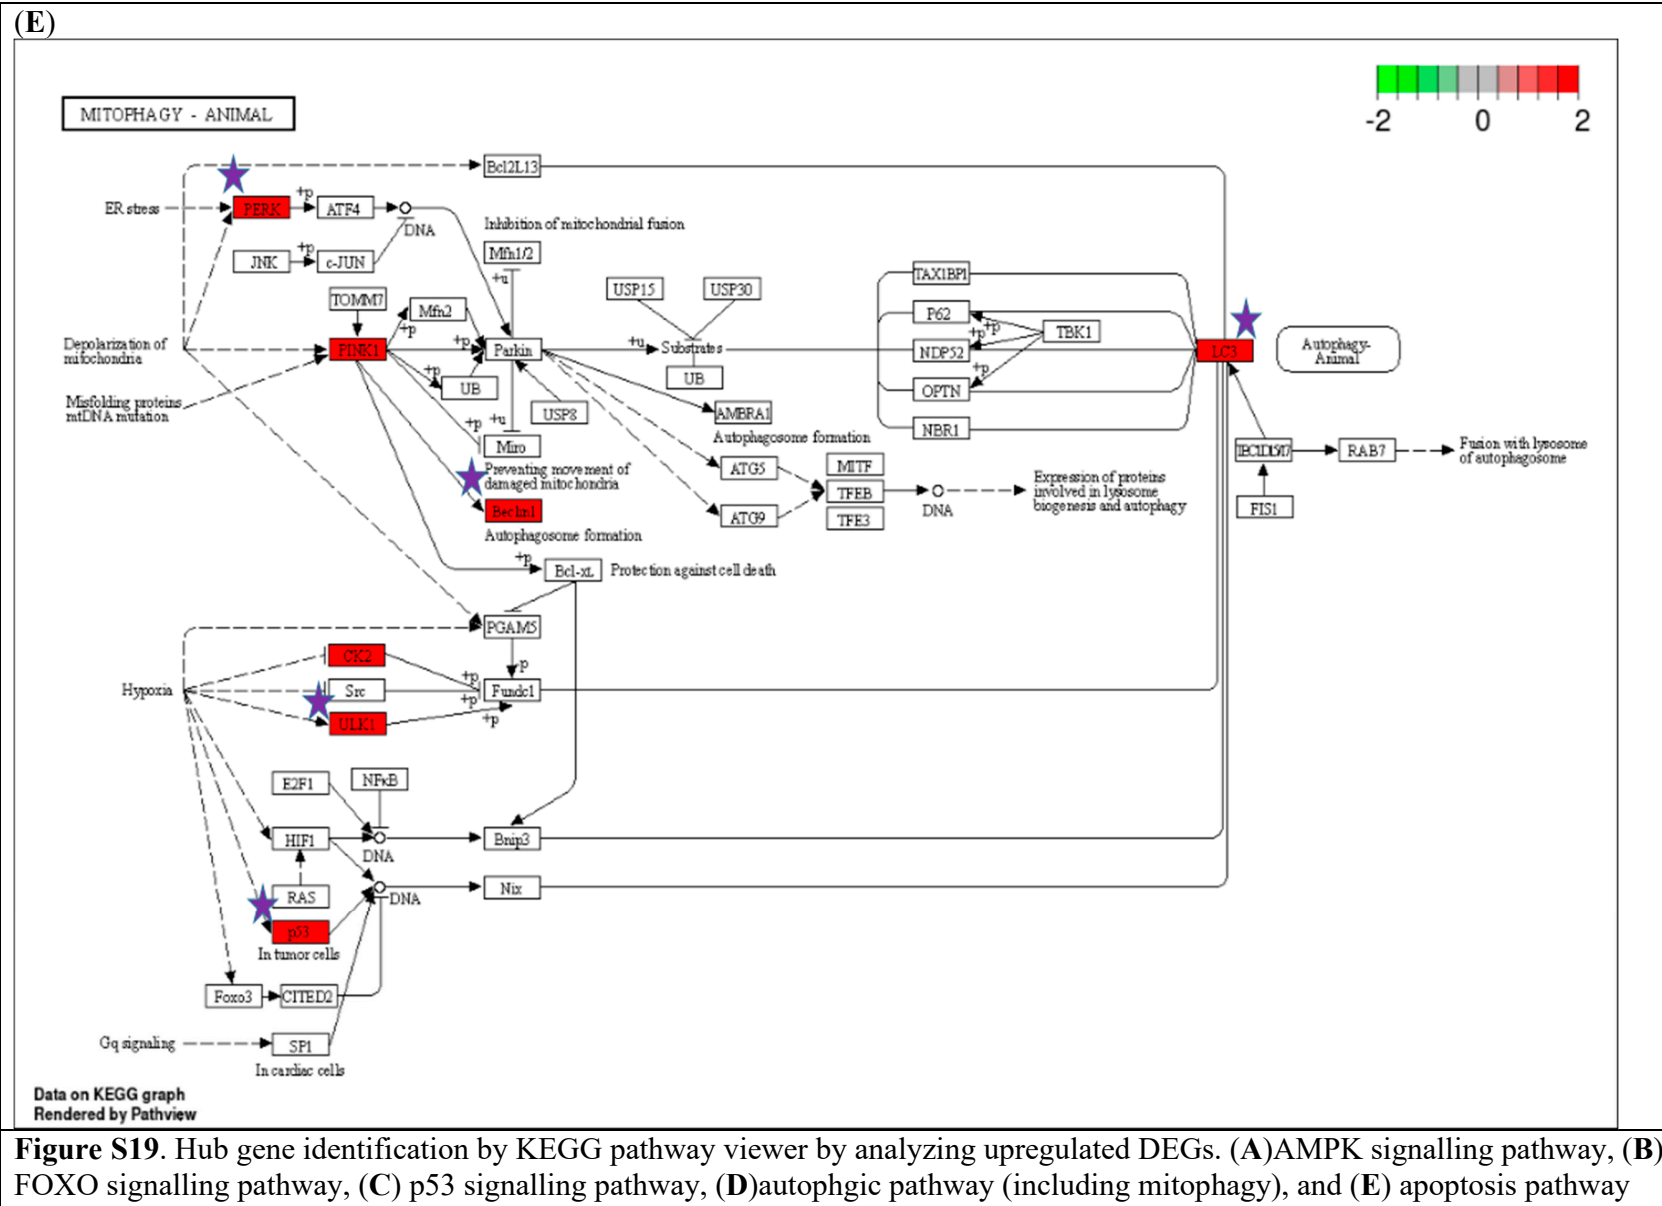

**Figure S19.** Hub gene identification by KEGG pathway viewer by analyzing upregulated DEGs. (A) AMPK signalling pathway, (B) FOXO signalling pathway, (C) p53 signalling pathway, (D) autophagic pathway (including mitophagy), and (E) apoptosis pathway

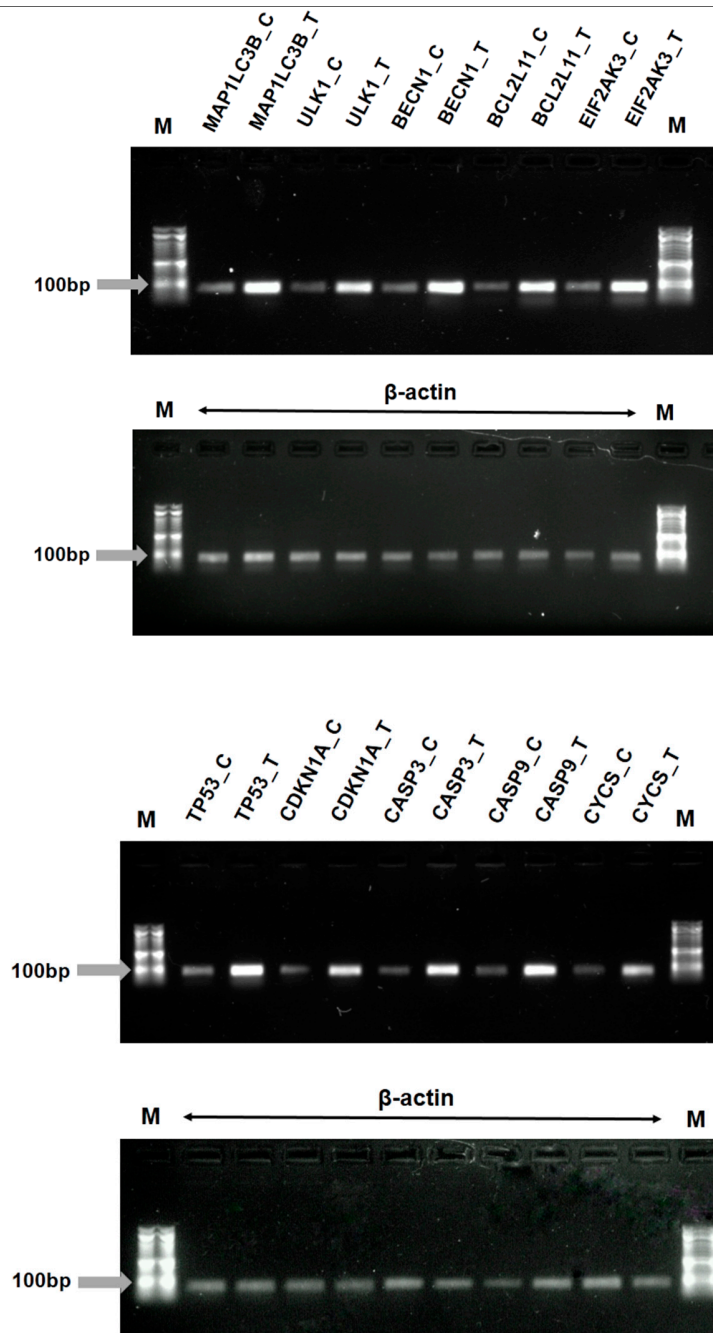

**Figure S20.** Validation of transcriptomic data by qRT-PCR amplification of different identified HUB genes. M-100 bp DNA ladder (Takara), gene\_C - Control (autophagic ACHN cells without treatment), gene\_T - Treated (Cisplatin-treated autophagic ACHN cells).

### Supplementary Tables

**Table S1.** Quantification of RNA from autophagic ACHN (control-AT1) and cisplatin-treated autophagic ACHN (treated- AT2) cell lines. Quantification was done at 260/280nm by NanoDrop plate reader (BMG Labtech, Germany).

| Sample         | Quantified RNA<br>(ng/ $\mu$ l) | OD<br>$A_{260/280}$ | OD<br>$A_{260/230}$ |
|----------------|---------------------------------|---------------------|---------------------|
| AT-1 (Control) | 512.3                           | 2.03                | 2.28                |
| AT-2 (Treated) | 495.6                           | 2.05                | 2.19                |

**Table S2.** Details of primers used in qRT-PCR for validation of RNAseq results.

| GENE     | Primer ID | Sequence                | Start | Stop | Length (base) | Tm (°C) | GC % | Amplicon Length |
|----------|-----------|-------------------------|-------|------|---------------|---------|------|-----------------|
| MAP1LC3B | MAP1LC3BF | GTTACGGAAAGCAGCAGTGTA   | 1265  | 1286 | 21            | 63.0    | 47.6 | 102             |
|          | MAP1LC3BR | CAGAAGGGAGTGTGTCTGAATG  | 1345  | 1367 | 22            | 62.0    | 50   |                 |
| ULK1     | ULK1F     | CCACTGTGCTTGGACTTAGAA   | 4961  | 4982 | 21            | 62.0    | 47.6 | 113             |
|          | ULK1R     | AGTCGGCCATGAAGCAATAA    | 5054  | 5074 | 20            | 62.0    | 45   |                 |
| BECN1    | BECN1F    | CTACAGGATGGATGTGGAGAAAG | 1179  | 1202 | 23            | 62.0    | 47.8 | 98              |
|          | BECN1R    | TCCACTGCTCCTCAGAGTTA    | 1257  | 1277 | 20            | 62.0    | 50   |                 |
| BCL2L11  | BCL2L11F  | CTGCTGGACACACACATACA    | 2793  | 2813 | 20            | 62.0    | 50   | 116             |
|          | BCL2L11R  | GGGCTGAGGAAACAGAGTAAA   | 2888  | 2909 | 21            | 62.0    | 47.6 |                 |
| EIF2AK3  | EIF2AK3F  | GGAGGACAAGTAGCACAAACT   | 3713  | 3734 | 21            | 62.0    | 47.6 | 107             |
|          | EIF2AK3R  | GTAAACCCACCCTAGAACCATC  | 3798  | 3820 | 22            | 62.0    | 50   |                 |
| TP53     | TP53F     | AGGGATGTTTGGGAGATGTAAG  | 1565  | 1587 | 22            | 62.0    | 45.5 | 99              |
|          | TP53R     | CCTGGTTAGTACGGTGAAGTG   | 1643  | 1664 | 21            | 62.0    | 52.4 |                 |
| CDKN1A   | CDKN1AF   | CGGAACAAGGAGTCAGACATT   | 1749  | 1770 | 21            | 62.0    | 47.6 | 105             |
|          | CDKN1AR   | AGTGCCAGGAAAGACAACACTAC | 1833  | 1854 | 21            | 62.0    | 47.6 |                 |
| CASP3    | CASP3F    | GCTGCCTGTAACCTTGAGAGTAG | 1979  | 2001 | 22            | 62.0    | 50   | 117             |

|                |        |                        |      |      |    |      |      |     |
|----------------|--------|------------------------|------|------|----|------|------|-----|
|                | CASP3R | GTATGGAGAAATGGGCTGTAGG | 2074 | 2096 | 22 | 62.0 | 50   |     |
| CASP9          | CAS9F  | CACAGGGTCTGCTCTTTCTC   | 1376 | 1396 | 20 | 62.0 | 55   | 100 |
|                | CAS9R  | CATTCATCTGTCCCTCTTCCTC | 1454 | 1476 | 22 | 62.0 | 50   |     |
| CYCS           | CYCSF  | TGGCTAGTTGTGGCGTTTAG   | 2132 | 2152 | 20 | 62.0 | 50   | 115 |
|                | CYCSR  | GCTTGAGCCTGGGAAATAGAG  | 2226 | 2247 | 21 | 62.0 | 52.4 |     |
| $\beta$ -actin | ACTBF  | GGACCTGACTGACTACCTCAT  | 633  | 654  | 21 | 62.0 | 52.4 | 107 |
|                | ACTBR  | CGTAGCACAGCTTCTCCTTAAT | 718  | 740  | 22 | 62.0 | 45.5 |     |

**Table S3.** Sequencing statistics obtained from IlluminaHiseq 4000 paired end sequencing. Where, AT-1= control (autophagic ACHN) and AT-2 = treated (cisplatin-treated autophagic ACHN).

| Sample         | No. PE reads | Total No. of bases | Data in Gb | GC%   |
|----------------|--------------|--------------------|------------|-------|
| AT-1 (Control) | 1,08,78,317  | 3,285,251,734      | 3.28       | 48.48 |
| AT-2 (Treated) | 1,23,87,553  | 3,741,041,006      | 3.74       | 49.77 |

**Table S4.** All the significantly upregulated DEGs in response to combinatorial treatment of starvation induced autophagy and cisplatin in ACHN cell line were generated by EdgeR package. Upto 86 upregulated DEGs were identified with log2Fc >2 with adjusted p-value <0.05.

| Sl. No. | Gene_ID         | Entrez_ID | Gene Annotation                                        | Gene symbol | Log2Fold Change |
|---------|-----------------|-----------|--------------------------------------------------------|-------------|-----------------|
| 1       | ENSG00000100033 | 5625      | proline dehydrogenase (oxidase) 1                      | PRODH       | 5.86            |
| 2       | ENSG00000136925 | 158427    | thiosulfate sulfurtransferase like domain containing 2 | TSTD2       | 4.61            |
| 3       | ENSG00000158828 | 65018     | PTEN induced putative kinase 1                         | PINK1       | 3.98            |
| 4       | ENSG00000132906 | 842       | caspase 9                                              | CASP9       | 3.93            |
| 5       | ENSG00000136997 | 4609      | v-myc avian myelocytomatosis viral oncogene homolog    | MYC         | 3.89            |
| 6       | ENSG00000126581 | 8678      | beclin 1                                               | BECN1       | 3.88            |
| 7       | ENSG00000141510 | 7157      | tumor protein p53                                      | TP53        | 3.85            |
| 8       | ENSG00000172115 | 54205     | cytochrome c                                           | CYCS        | 3.83            |
| 9       | ENSG00000173530 | 8793      | TNF receptor superfamily member 10d                    | TNFRSF10D   | 3.81            |
| 10      | ENSG00000168906 | 4144      | methionine adenosyltransferase 2A                      | MAT2A       | 3.80            |
| 11      | ENSG00000140941 | 81631     | microtubule-associated protein 1 light chain 3 beta    | MAP1LC3B    | 3.78            |

|    |                 |        |                                                                                  |           |      |
|----|-----------------|--------|----------------------------------------------------------------------------------|-----------|------|
| 12 | ENSG00000197769 | 440738 | microtubule associated protein 1 light chain 3 gamma                             | MAP1LC3C  | 3.76 |
| 13 | ENSG00000237296 | 641298 | SMG1P1, nonsense mediated mRNA decay associated PI3K related kinase pseudogene 1 | SMG1P1    | 3.75 |
| 14 | ENSG00000164305 | 836    | caspase 3                                                                        | CASP3     | 3.73 |
| 15 | ENSG00000172977 | 10524  | lysine acetyltransferase 5                                                       | KAT5      | 3.72 |
| 16 | ENSG00000109971 | 3312   | heat shock protein family A                                                      | HSPA8     | 3.70 |
| 17 | ENSG00000136231 | 10643  | insulin like growth factor 2 mRNA binding protein 3                              | IGF2BP3   | 3.67 |
| 18 | ENSG00000139618 | 675    | BRCA2, DNA repair associated                                                     | BRCA2     | 3.67 |
| 19 | ENSG00000132356 | 5562   | protein kinase AMP-activated catalytic subunit alpha 1                           | AMPK      | 3.65 |
| 20 | ENSG00000071794 | 6596   | Helicase-like transcription factor                                               | HLTF      | 3.63 |
| 21 | ENSG00000178252 | 11180  | WD repeat domain 6                                                               | WDR6      | 3.61 |
| 22 | ENSG00000176986 | 9632   | SEC24 family member C                                                            | SEC24C    | 3.58 |
| 23 | ENSG00000164654 | 54468  | meiosis regulator for oocyte development                                         | MIOS      | 3.55 |
| 24 | ENSG00000213621 | 642641 | Ribosomal protein SA pseudogene 54                                               | RPSAP54   | 3.48 |
| 25 | ENSG00000111725 | 5564   | protein kinase AMP-activated non-catalytic subunit beta 1                        | PRKAB1    | 3.42 |
| 26 | ENSG00000146834 | 56257  | Methylphosphate capping enzyme                                                   | MEPCE     | 3.39 |
| 27 | ENSG00000139112 | 23710  | GABA type A receptor associated protein like 1                                   | GABARAPL1 | 3.31 |
| 28 | ENSG00000149547 | 9538   | EI24 autophagy associated transmembrane protein                                  | EI24      | 3.29 |
| 29 | ENSG00000253537 | 56108  | protocadherin gamma subfamily A, 7                                               | PCDHGA7   | 3.28 |
| 30 | ENSG00000075239 | 38     | acetyl-CoA acetyltransferase 1                                                   | ACAT1     | 3.25 |

|    |                 |        |                                                                           |          |      |
|----|-----------------|--------|---------------------------------------------------------------------------|----------|------|
| 31 | ENSG00000117862 | 51060  | Thioredoxin domain containing 12                                          | TXNDC12  | 3.23 |
| 32 | ENSG00000100644 | 3091   | hypoxia inducible factor 1 alpha subunit                                  | HiF1A    | 3.01 |
| 33 | ENSG00000137496 | 10068  | interleukin 18 binding protein                                            | IL18BP   | 3.01 |
| 34 | ENSG00000184557 | 9021   | suppressor of cytokine signaling 3                                        | SOCS3    | 2.95 |
| 35 | ENSG00000116044 | 4780   | nuclear factor, erythroid 2 like 2                                        | NFE2L2   | 2.93 |
| 36 | ENSG00000243547 | 644063 | Heterogeneous nuclear ribonucleoprotein K pseudogene 4                    | HNRNPKP4 | 2.92 |
| 37 | ENSG00000104419 | 10397  | N-myc downstream regulated 1                                              | NDRG1    | 2.90 |
| 38 | ENSG00000004700 | 5965   | RecQ like helicase                                                        | RECQL    | 2.90 |
| 39 | ENSG00000165943 | 64112  | modulator of apoptosis 1                                                  | MOAP1    | 2.89 |
| 40 | ENSG00000005194 | 57019  | cytokine induced apoptosis inhibitor 1                                    | CIAPIN1  | 2.85 |
| 41 | ENSG00000170345 | 2353   | FosB proto-oncogene, AP-1 transcription factor subunit                    | FOS      | 2.84 |
| 42 | ENSG00000159388 | 7832   | BTG anti-proliferation factor 2                                           | BTG2     | 2.83 |
| 43 | ENSG00000076685 | 22978  | 5,-nucleotidase, cytosolic II                                             | NT5C2    | 2.80 |
| 44 | ENSG00000106100 | 10392  | nucleotide binding oligomerization domain containing 1                    | NOD1     | 2.78 |
| 45 | ENSG00000163399 | 476    | ATPase, Na <sup>+</sup> /K <sup>+</sup> transporting, alpha 1 polypeptide | ATP1A1   | 2.76 |
| 46 | ENSG00000172071 | 9451   | eukaryotic translation initiation factor 2 alpha kinase 3                 | EIF2AK3  | 2.71 |
| 47 | ENSG00000075975 | 23609  | Makorin ring finger protein 2                                             | MKRN2    | 2.68 |
| 48 | ENSG00000123416 | 10376  | Tubulin, alpha 1b                                                         | TUBA1B   | 2.68 |
| 49 | ENSG00000175344 | 1139   | cholinergic receptor nicotinic alpha 7 subunit                            | CHRNA7   | 2.67 |
| 50 | ENSG00000175104 | 7189   | TNF receptor associated factor 6                                          | TRAF6    | 2.66 |
| 51 | ENSG00000269713 | 400818 | neuroblastoma breakpoint family                                           | NBPF9    | 2.65 |



|    |                 |        |                                                                                         |          |      |
|----|-----------------|--------|-----------------------------------------------------------------------------------------|----------|------|
|    |                 |        | member 9                                                                                |          |      |
| 52 | ENSG00000163874 | 80149  | zinc finger CCCH-type containing 12A                                                    | ZC3H12A  | 2.65 |
| 53 | ENSG00000198146 | 54989  | Zinc finger protein 770                                                                 | ZNF770   | 2.63 |
| 54 | ENSG00000019995 | 54764  | Zinc finger, RAN-binding domain containing 1                                            | ZRANB1   | 2.63 |
| 55 | ENSG00000118515 | 6446   | serum/glucocorticoid regulated kinase 1                                                 | SGK1     | 2.62 |
| 56 | ENSG00000116954 | 64121  | Ras related GTP binding C                                                               | RRAGC    | 2.61 |
| 57 | ENSG00000073111 | 4171   | Minichromosome maintenance complex component 2                                          | MCM2     | 2.6  |
| 58 | ENSG00000172530 | 54971  | BTG3 associated nuclear protein                                                         | BANP     | 2.6  |
| 59 | ENSG00000085491 | 29957  | solute carrier family 25 member 24                                                      | SLC25A24 | 2.59 |
| 60 | ENSG00000056558 | 7185   | TNF receptor associated factor 1                                                        | TRAF1    | 2.55 |
| 61 | ENSG00000142178 | 150094 | salt inducible kinase 1                                                                 | SIK1     | 2.51 |
| 62 | ENSG00000141376 | 54828  | BCAS3, microtubule associated cell migration factor                                     | BCAS3    | 2.51 |
| 63 | ENSG00000100462 | 10419  | protein arginine methyltransferase 5                                                    | PRMT5    | 2.5  |
| 64 | ENSG00000144560 | 9686   | vestigial like family member 4                                                          | VGLL4    | 2.49 |
| 65 | ENSG00000101266 | 1457   | casein kinase 2 alpha 1                                                                 | CSNK2A1  | 2.49 |
| 66 | ENSG00000153094 | 10018  | BCL2 like 11                                                                            | BCL2L11  | 2.49 |
| 67 | ENSG00000100129 | 51386  | Eukaryotic translation initiation factor 3, subunit L                                   | EIF3L    | 2.48 |
| 68 | ENSG00000154803 | 201163 | folliculin                                                                              | FLCN     | 2.48 |
| 69 | ENSG00000132155 | 5894   | V-raf-1 murine leukemia viral oncogene homolog 1                                        | RAF1     | 2.48 |
| 70 | ENSG00000128016 | 7538   | ZFP36 ring finger protein                                                               | ZFP36    | 2.47 |
| 71 | ENSG00000105355 | 10226  | Perilipin 3                                                                             | PLIN3    | 2.46 |
| 72 | ENSG00000069869 | 4734   | neural precursor cell expressed, developmentally down-regulated 4, E3 ubiquitin protein | NEDD4    | 2.46 |

|    |                 |        |                                                                         |          |      |
|----|-----------------|--------|-------------------------------------------------------------------------|----------|------|
|    |                 |        | ligase                                                                  |          |      |
| 73 | ENSG00000148339 | 114789 | solute carrier family 25 member 25                                      | SLC25A25 | 2.43 |
| 74 | ENSG00000183098 | 10082  | glypican 6                                                              | GPC6     | 2.42 |
| 75 | ENSG00000068903 | 22933  | sirtuin 2                                                               | SIRT2    | 2.42 |
| 76 | ENSG00000124762 | 1026   | cyclin dependent kinase inhibitor 1A                                    | CDKN1A   | 2.41 |
| 77 | ENSG00000092871 | 117584 | ring finger and FYVE like domain containing E3 ubiquitin protein ligase | RFFL     | 2.39 |
| 78 | ENSG00000135720 | 1783   | Dynein, cytoplasmic 1, light intermediate chain 2                       | DYNC1LI2 | 2.38 |
| 79 | ENSG00000131791 | 5565   | protein kinase AMP-activated non-catalytic subunit beta 2               | PRKAB2   | 2.36 |
| 80 | ENSG00000264364 | 140735 | dynein light chain LC8-type 2                                           | DYNLL2   | 2.33 |
| 81 | ENSG00000237506 | 220885 | Ribosomal protein SA pseudogene 15                                      | RPSAP15  | 2.31 |
| 82 | ENSG00000131558 | 60412  | exocyst complex component 4                                             | EXOC4    | 2.27 |
| 83 | ENSG00000182473 | 23265  | exocyst complex component 7                                             | EXOC7    | 2.11 |
| 84 | ENSG00000177169 | 8408   | unc-51 like autophagy activating kinase 1                               | ULK1     | 2.07 |
| 85 | ENSG00000116285 | 54206  | ERBB receptor feedback inhibitor 1                                      | ERRFI1   | 2.07 |
| 86 | ENSG00000165861 | 53349  | zinc finger FYVE-type containing 1                                      | ZFYVE1   | 2.01 |

**Table S5.** All the significantly downregulated DEGs in response to combinatorial treatment of starvation induced autophagy and cisplatin in ACHN cell line. Top 60 DEGs were identified by EdgeR with log2Fc >2 with adjusted p-value <0.05.

| Sl. No. | Gene_ID         | Entrez_ID | Gene Annotation                      | Gene symbol | Log2Fold Change |
|---------|-----------------|-----------|--------------------------------------|-------------|-----------------|
| 1       | ENSG00000254960 | 100874251 | KIRREL3 antisense RNA 2              | KIRREL3-AS2 | -5.11           |
| 2       | ENSG00000118971 | 894       | cyclin D2                            | CCND2       | -3.98           |
| 3       | ENSG00000116039 | 525       | ATPase H+ transporting V1 subunit B1 | ATP6V1B1    | -3.95           |

|    |                 |           |                                                  |          |       |
|----|-----------------|-----------|--------------------------------------------------|----------|-------|
| 4  | ENSG00000198695 | 4541      | Mitochondrially encoded NADH dehydrogenase 6     | ND6      | -3.88 |
| 5  | ENSG00000198763 | 4536      | Mitochondrially encoded NADH dehydrogenase 2     | ND2      | -3.86 |
| 6  | ENSG00000245573 | 497258    | BDNF antisense RNA                               | BDNF-AS  | -3.84 |
| 7  | ENSG00000015479 | 9782      | matrin 3                                         | MATR3    | -3.44 |
| 8  | ENSG00000181722 | 26137     | zinc finger and BTB domain containing 20         | ZBTB20   | -3.42 |
| 9  | ENSG00000146955 | 401409    | RAB19, member RAS oncogene family                | RAB19    | -3.41 |
| 10 | ENSG00000198886 | 4538      | Mitochondrially encoded NADH dehydrogenase 4     | ND4      | -3.38 |
| 11 | ENSG00000092853 | 63967     | claspin                                          | CLSPN    | -3.38 |
| 12 | ENSG00000114861 | 27086     | forkhead box P1                                  | FOXP1    | -3.32 |
| 13 | ENSG00000235034 | 342918    | chromosome 19 open reading frame 81              | C19orf81 | -3.31 |
| 14 | ENSG00000198625 | 4194      | MDM4, p53 regulator                              | MDM4     | -3.31 |
| 15 | ENSG00000198786 | 4540      | Mitochondrially encoded NADH dehydrogenase 5     | ND5      | -3.3  |
| 16 | ENSG00000102524 | 10673     | tumor necrosis factor superfamily member 13b     | TNFSF13B | -3.28 |
| 17 | ENSG00000130748 | 54958     | transmembrane protein 160                        | TMEM160  | -3.27 |
| 18 | ENSG00000198712 | 4513      | Mitochondrially encoded cytochrome c oxidase II  | COX2     | -3.27 |
| 19 | ENSG00000157613 | 90993     | cAMP responsive element binding protein 3 like 1 | CREB3L1  | -3.27 |
| 20 | ENSG00000243449 | 401115    | chromosome 4 open reading frame 48               | C4orf48  | -3.26 |
| 21 | ENSG00000078081 | 27074     | lysosomal associated membrane protein 3          | LAMP3    | -3.26 |
| 22 | ENSG00000182154 | 64975     | mitochondrial ribosomal protein L41              | MRPL41   | -3.23 |
| 23 | ENSG00000260001 | 100507588 | transforming growth factor beta receptor 3 like  | TGFBR3L  | -3.22 |
| 24 | ENSG00000101109 | 6789      | serine/threonine kinase 4                        | STK4     | -3.05 |
| 25 | ENSG00000198899 | 4508      | Mitochondrially                                  | ATP6     | -3.04 |

|    |                 |           |                                                                   |          |       |
|----|-----------------|-----------|-------------------------------------------------------------------|----------|-------|
|    |                 |           | encoded ATP synthase 6                                            |          |       |
| 26 | ENSG00000161642 | 25946     | zinc finger protein 385A                                          | ZNF385A  | -3.01 |
| 27 | ENSG00000237973 | 107075141 | Hsa-mir-6723                                                      | MTCO1P12 | -3    |
| 28 | ENSG00000112137 | 221692    | phosphatase and actin regulator 1                                 | PHACTR1  | -3    |
| 29 | ENSG00000225630 | 100652939 | MT-ND2 pseudogene 28                                              | MTND2P28 | -2.99 |
| 30 | ENSG00000248527 | 44575     | Mitochondrially encoded ATP synthase 6 pseudogene 1               | MTATP6P1 | -2.99 |
| 31 | ENSG00000106211 | 3315      | heat shock protein family B                                       | HSPB1    | -2.99 |
| 32 | ENSG00000198840 | 4537      | Mitochondrially encoded NADH dehydrogenase 3                      | ND3      | -2.94 |
| 33 | ENSG00000060339 | 55749     | cell division cycle and apoptosis regulator 1                     | CCAR1    | -2.94 |
| 34 | ENSG00000254206 | 728888    | nuclear pore complex interacting protein family member B11        | NPIP11   | -2.91 |
| 35 | ENSG00000227507 | 4050      | lymphotoxin beta                                                  | LTB      | -2.91 |
| 36 | ENSG00000213639 | 5500      | protein phosphatase 1 catalytic subunit beta                      | PPP1CB   | -2.91 |
| 37 | ENSG00000251562 | 378938    | metastasis associated lung adenocarcinoma transcript 1            | MALAT1   | -2.9  |
| 38 | ENSG00000051523 | 1535      | cytochrome b-245 alpha chain                                      | CYBA     | -2.77 |
| 39 | ENSG00000198727 | 4519      | Mitochondrially encoded cytochrome b                              | CYTB     | -2.76 |
| 40 | ENSG00000149639 | 140710    | suppressor of glucose, autophagy associated 1                     | SOGA1    | -2.7  |
| 41 | ENSG00000242299 | 100131863 | Ribosomal Protein S18 Pseudogene 5                                | RPS18P5  | -2.69 |
| 42 | ENSG00000110395 | 867       | Cbl proto-oncogene                                                | CBL      | -2.64 |
| 43 | ENSG00000142544 | 90353     | cytosolic thiouridylase subunit 1                                 | CTU1     | -2.62 |
| 44 | ENSG00000111057 | 3875      | keratin 18                                                        | KRT18    | -2.59 |
| 45 | ENSG00000175567 | 7351      | uncoupling protein 2                                              | UCP2     | -2.52 |
| 46 | ENSG00000168092 | 5049      | platelet activating factor acetylhydrolase 1b catalytic subunit 2 | PAFAH1B2 | -2.5  |
| 47 | ENSG00000180211 | 646949    | Ribosomal Protein L23 Pseudogene 6                                | RPL23P6  | -2.49 |

|    |                 |        |                                                     |           |       |
|----|-----------------|--------|-----------------------------------------------------|-----------|-------|
| 48 | ENSG00000249992 | 25907  | transmembrane protein 158                           | TMEM158   | -2.49 |
| 49 | ENSG00000236824 | 618    | brain cytoplasmic RNA 1                             | BCYRN1    | -2.49 |
| 50 | ENSG00000130222 | 10912  | growth arrest and DNA damage inducible gamma        | GADD45G   | -2.49 |
| 51 | ENSG00000164761 | 4982   | TNF receptor superfamily member 11b                 | TNFRSF11B | -2.49 |
| 52 | ENSG00000228253 | 4509   | Mitochondrially encoded ATP synthase 8              | ATP8      | -2.48 |
| 53 | ENSG00000103490 | 29108  | PYD and CARD domain containing                      | PYCARD    | -2.47 |
| 54 | ENSG00000234009 | 388907 | Ribosomal protein L5 pseudogene 34                  | RPL5P34   | -2.46 |
| 55 | ENSG00000087088 | 581    | BCL2 associated X, apoptosis regulator              | BAX       | -2.42 |
| 56 | ENSG00000159079 | 56683  | ATPase H <sup>+</sup> transporting V1 subunit B1    | CFAP298   | -2.4  |
| 57 | ENSG00000156735 | 9530   | BCL2 associated athanogene 4                        | BAG4      | -2.4  |
| 58 | ENSG00000101745 | 23253  | cyclin D2                                           | ANKRD12   | -2.35 |
| 59 | ENSG00000075151 | 8672   | eukaryotic translation initiation factor 4 gamma 3  | EIF4G3    | -2.35 |
| 60 | ENSG00000080824 | 3320   | heat shock protein 90 alpha family class A member 1 | HSP90AA1  | -2.02 |

**Table S6.** Top ranked hub genes with individual scores determined by 12 different algorithm run by CytoScape plugin Cytohubba.

| Betweenness         | Bottleneck       | Closeness           | Clustering coefficient | Degree           | DMNC               | EcCentricity       | EPC                 | MCC                   | MNC              | Radiality          | Stress            |
|---------------------|------------------|---------------------|------------------------|------------------|--------------------|--------------------|---------------------|-----------------------|------------------|--------------------|-------------------|
| TP53<br>(238.24)    | TP53<br>(14)     | TP53<br>(26.5)      | ZFYVE1<br>(1)          | TP53<br>(24)     | EIF2AK3<br>(0.89)  | CASP3<br>(0.5)     | TP53<br>(14.15)     | TP53<br>(1453719)     | TP53<br>(23)     | TP53<br>(4)        | TP53<br>(634)     |
| MYC<br>(92.48)      | MYC<br>(4)       | MYC<br>(23.83)      | NDRG1<br>(1)           | MYC<br>(19)      | NFE2L2<br>(0.87)   | TP53<br>(0.5)      | BECN1<br>(13.46)    | CASP3<br>(1453202)    | MYC<br>(19)      | MYC<br>(3.79)      | MYC<br>(296)      |
| MAP1LC3B<br>(70.86) | MAP1LC3B<br>(3)  | MAP1LC3B<br>(23.33) | BECN1<br>(1)           | MAP1LC3B<br>(18) | CASP9<br>(0.84)    | MAP1LC3B<br>(0.33) | MYC<br>(13.46)      | MAP1LC3B<br>(1452894) | MAP1LC3B<br>(18) | MAP1LC3B<br>(3.75) | MAP1LC3B<br>(294) |
| BECN1<br>(60.65)    | GABARAPL1<br>(3) | HIF1A<br>(23.33)    | ZFP36<br>(1)           | HIF1A<br>(18)    | BCL2L11<br>(0.83)  | NFE2L2<br>(0.33)   | HIF1A<br>(13.36)    | HIF1A<br>(1452822)    | HIF1A<br>(18)    | HIF1A<br>(3.75)    | BECN1<br>(266)    |
| TRAF1<br>(56)       | CASP3<br>(3)     | BECN1<br>(23.33)    | NFE2L2<br>(0.97)       | BECN1<br>(18)    | CYCS<br>(0.79)     | HIF1A<br>(0.33)    | CASP3<br>(13.25)    | MYC<br>(1452806)      | BECN1<br>(18)    | BECN1<br>(3.75)    | HIF1A<br>(204)    |
| CASP3<br>(51.10)    | SOCS3<br>(2)     | CASP3<br>(22.5)     | EIF2AK3<br>(0.96)      | CASP3<br>(16)    | CDKN1A<br>(0.76)   | RAF1<br>(0.33)     | MAP1LC3B<br>(13.20) | CYCS<br>(1452240)     | CASP3<br>(16)    | CASP3<br>(3.72)    | CASP3<br>(202)    |
| HIF1A<br>(45.07)    | TRAF1<br>(2)     | CYCS<br>(20.83)     | MAP1LC3C<br>(0.93)     | CYCS<br>(13)     | MAP1LC3C<br>(0.66) | NEDD4<br>(0.33)    | CYCS<br>(12.34)     | CASP9<br>(1452240)    | CYCS<br>(13)     | CYCS<br>(3.58)     | ULK1<br>(134)     |
| ULK1<br>(27.91)     | PRKAA1<br>(2)    | CDKN1A<br>(20.33)   | BCL2L11<br>(0.89)      | CDKN1A<br>(12)   | RAF1<br>(0.65)     | MYC<br>(0.33)      | CASP9<br>(12.10)    | EIF2AK3<br>(1451520)  | CDKN1A<br>(12)   | CDKN1A<br>(3.55)   | TRAF1<br>(130)    |
| NEDD4<br>(15.60)    | BECN1<br>(2)     | CASP9<br>(20.33)    | CASP9<br>(0.87)        | ULK1<br>(12)     | CASP3<br>(0.65)    | KAT5<br>(0.33)     | BCL2L11<br>(12.02)  | BECN1<br>(727152)     | ULK1<br>(12)     | CASP9<br>(3.55)    | NEDD4<br>(86)     |
| SOCS3<br>(12.52)    | MAP1LC3C<br>(1)  | ULK1<br>(20.16)     | RAF1<br>(0.85)         | CASP9<br>(12)    | ZFYVE1<br>(0.64)   | CDKN1A<br>(0.33)   | CDKN1A<br>(12.00)   | BCL2L11<br>(726480)   | CASP9<br>(12)    | EIF2AK3<br>(3.51)  | GABARAPL1<br>(62) |

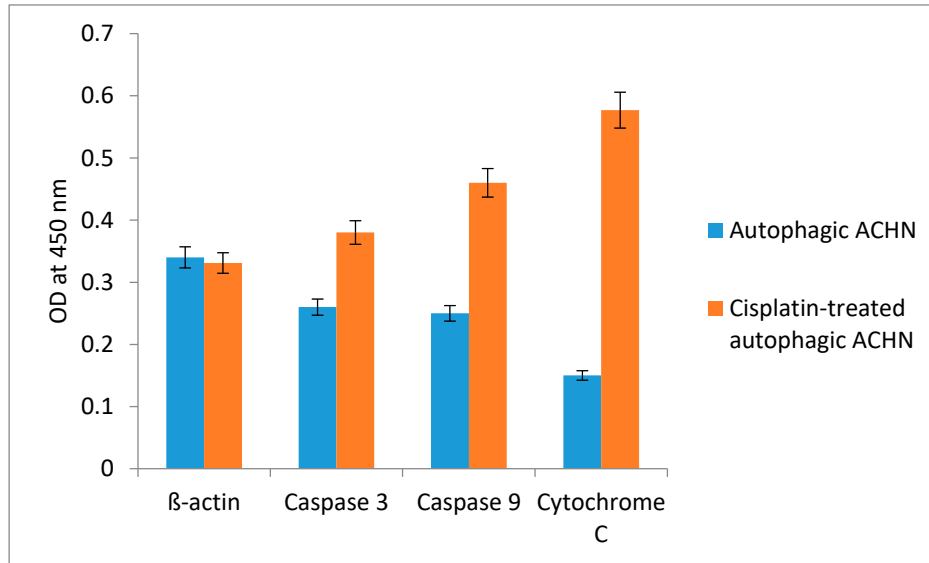

**Figure S21.** Antibody based indirect ELISA was used to assess apoptosis in autophagic ACHN cells and Cisplatin-treated autophagic ACHN cells. The cytosolic protein was extracted from each treatment condition and quantification of apoptosis-related biomarkers were achieved by recording absorbance at 450 nm using SPECTROStar Nano plate reader (BMG Labteck, Germany).
